# Supplementary material
Source: publisher figshare collection journal article supplement (https://gsajournals.figshare.com/articles/dataset/_/23519004)
Supplement: Supplementary file 1 [file 1]

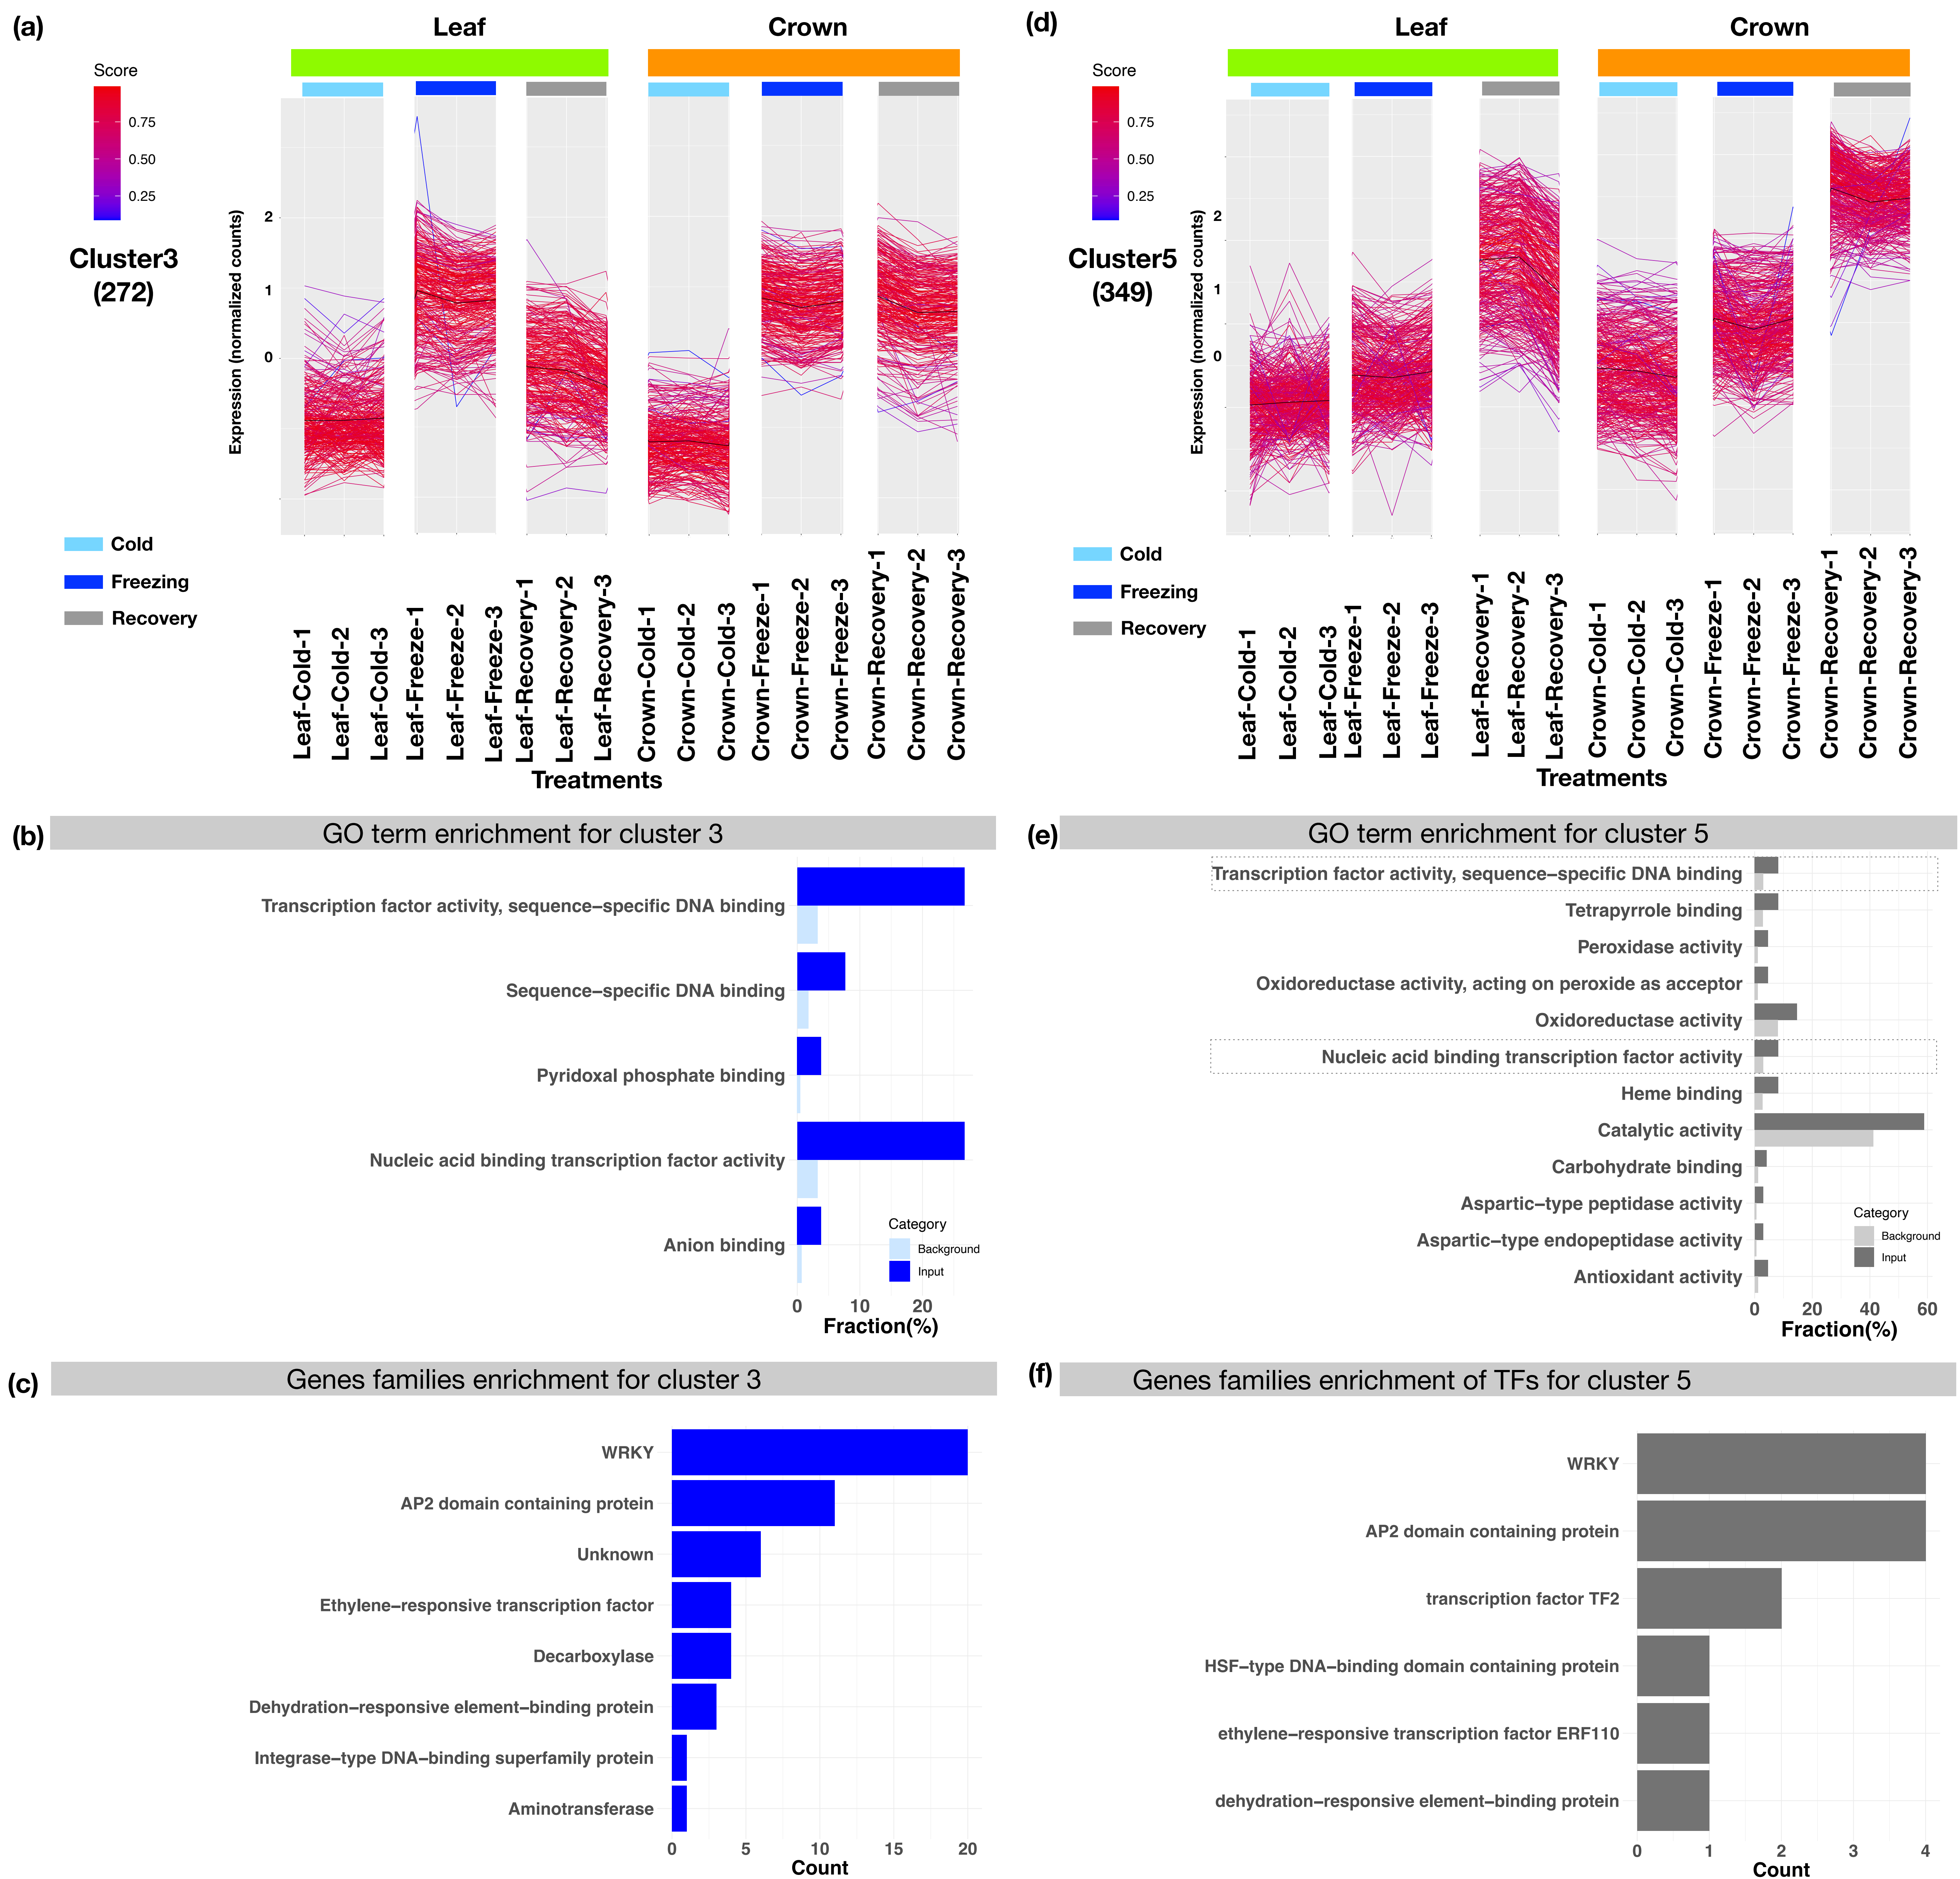

**Figure S3** Expression analysis using k-means clustering. (a) The cluster associated with freezing response (Cluster 3) based on K-mean clustering analysis. The clustering analysis utilized normalized counts for 3,296 DEGs with variance >1.5 and mean expression abundance >4. (b) Gene Ontology enrichment for the genes in Cluster 3. Only GO terms with FDR <0.05 are plotted. (c) Gene family enrichment for genes from Cluster 3. (d) The cluster associated with response to recovery from freezing (Cluster 5) based on K-mean clustering. (e) Gene Ontology enrichment for the genes in Cluster 5. Only GO terms with FDR <0.05 were plotted. (f) Gene family enrichment for genes from Cluster 5.
