# Supplementary material
Source: publisher figshare collection journal article supplement (https://gsajournals.figshare.com/articles/dataset/_/23519004)
Supplement: Supplementary file 1 [file 1]

## Sheet: Sheet1
TableS6 All of the candidate transcription factors in B. sylvaticum.
Protein ID in B. distachyon	Gene ID in B. distachyon	Abv.	Gene ID in B. sylvaticum
Bradi2g17610.1.p	Bradi2g17610	RAV	Brasy8G044000
Bradi2g02720.1.p	Bradi2g02720	RAV	Brasy1G513800
Bradi2g47220.1.p	Bradi2g47220	RAV	Brasy9G123200
Bradi2g02710.2.p	Bradi2g02710	RAV	Brasy1G513900
Bradi2g02710.1.p	Bradi2g02710	RAV	Brasy1G513900
Bradi1g01058.2.p	Bradi1g01058	WRKY	Brasy2G484100
Bradi1g01058.3.p	Bradi1g01058	WRKY	Brasy2G484100
Bradi1g01130.1.p	Bradi1g01130	HSF	Brasy2G483100
Bradi1g01130.2.p	Bradi1g01130	HSF	Brasy2G483100
Bradi1g01300.1.p	Bradi1g01300	NF-YC	Brasy2G480900
Bradi1g01640.2.p	Bradi1g01640	NAC	Brasy2G452900
Bradi1g01650.1.p	Bradi1g01650	NAC	Brasy2G452900
Bradi1g01683.1.p	Bradi1g01683	NAC	Brasy2G451900
Bradi1g01801.1.p	Bradi1g01801	NAC	Brasy2G450300
Bradi1g01990.1.p	Bradi1g01990	FAR1	Brasy2G446400
Bradi1g01990.3.p	Bradi1g01990	FAR1	Brasy2G446400
Bradi1g01990.5.p	Bradi1g01990	FAR1	Brasy2G446400
Bradi1g02327.1.p	Bradi1g02327	WRKY	Brasy5G523000
Bradi1g02327.2.p	Bradi1g02327	WRKY	Brasy5G523000
Bradi1g02760.1.p	Bradi1g02760	SBP	Brasy2G435500
Bradi1g03020.1.p	Bradi1g03020	GATA	Brasy2G427700
Bradi1g03245.1.p	Bradi1g03245	NAC	Brasy2G424500
Bradi1g03313.1.p	Bradi1g03313	NAC	Brasy2G423900
Bradi1g03620.1.p	Bradi1g03620	GRAS	Brasy2G418400
Bradi1g03620.2.p	Bradi1g03620	GRAS	Brasy2G418400
Bradi1g03620.3.p	Bradi1g03620	GRAS	Brasy2G418400
Bradi1g03710.2.p	Bradi1g03710	Dof	Brasy5G397600
Bradi1g03710.3.p	Bradi1g03710	Dof	Brasy5G397600
Bradi1g03710.4.p	Bradi1g03710	Dof	Brasy5G397600
Bradi1g04150.1.p	Bradi1g04150	NAC	Brasy2G409000
Bradi1g04280.2.p	Bradi1g04280	bHLH	Brasy2G406400
Bradi1g04280.3.p	Bradi1g04280	bHLH	Brasy2G406400
Bradi1g04510.2.p	Bradi1g04510	bZIP	Brasy2G403200
Bradi1g04510.3.p	Bradi1g04510	bZIP	Brasy2G403200
Bradi1g04510.4.p	Bradi1g04510	bZIP	Brasy2G403200
Bradi1g04510.5.p	Bradi1g04510	bZIP	Brasy2G403200
Bradi1g05037.1.p	Bradi1g05037	bHLH	Brasy2G200900
Bradi1g05037.2.p	Bradi1g05037	bHLH	Brasy2G200900
Bradi1g05346.1.p	Bradi1g05346	WRKY	Brasy2G392000
Bradi1g05346.2.p	Bradi1g05346	WRKY	Brasy2G392000
Bradi1g05430.1.p	Bradi1g05430	bHLH	Brasy2G391000
Bradi1g05430.3.p	Bradi1g05430	bHLH	Brasy2G391000
Bradi1g05480.1.p	Bradi1g05480	bZIP	Brasy2G390600
Bradi1g05550.1.p	Bradi1g05550	HSF	Brasy2G389900
Bradi1g06225.1.p	Bradi1g06225	LBD	Brasy2G381800
Bradi1g06460.1.p	Bradi1g06460	TCP	Brasy2G368900
Bradi1g06670.1.p	Bradi1g06670	bHLH	Brasy2G366100
Bradi1g06907.2.p	Bradi1g06907	FAR1	Brasy2G429600
Bradi1g06907.3.p	Bradi1g06907	FAR1	Brasy2G429600
Bradi1g06907.4.p	Bradi1g06907	FAR1	Brasy2G429600
Bradi1g06907.5.p	Bradi1g06907	FAR1	Brasy2G429600
Bradi1g06907.6.p	Bradi1g06907	FAR1	Brasy2G429600
Bradi1g06907.7.p	Bradi1g06907	FAR1	Brasy2G429600
Bradi1g06970.1.p	Bradi1g06970	NAC	Brasy2G430100
Bradi1g07310.3.p	Bradi1g07310	bZIP	Brasy2G356800
Bradi1g07600.1.p	Bradi1g07600	Dof	Brasy2G352800
Bradi1g07936.1.p	Bradi1g07936	bHLH	Brasy2G349000
Bradi1g07970.1.p	Bradi1g07970	WRKY	Brasy2G348600
Bradi1g08106.2.p	Bradi1g08106	WRKY	Brasy2G347400
Bradi1g08106.3.p	Bradi1g08106	WRKY	Brasy2G347400
Bradi1g08891.1.p	Bradi1g08891	HSF	Brasy2G336100
Bradi1g08891.2.p	Bradi1g08891	HSF	Brasy2G336100
Bradi1g08891.3.p	Bradi1g08891	HSF	Brasy2G336100
Bradi1g08891.4.p	Bradi1g08891	HSF	Brasy2G336100
Bradi1g08891.5.p	Bradi1g08891	HSF	Brasy2G336100
Bradi1g08891.6.p	Bradi1g08891	HSF	Brasy2G336100
Bradi1g09170.1.p	Bradi1g09170	WRKY	Brasy2G333300
Bradi1g09177.1.p	Bradi1g09177	bHLH	Brasy2G333100
Bradi1g09550.1.p	Bradi1g09550	GATA	Brasy2G328900
Bradi1g09550.2.p	Bradi1g09550	GATA	Brasy2G328900
Bradi1g09960.1.p	Bradi1g09960	bHLH	Brasy2G324500
Bradi1g09960.2.p	Bradi1g09960	bHLH	Brasy2G324500
Bradi1g09960.3.p	Bradi1g09960	bHLH	Brasy2G324500
Bradi1g09960.4.p	Bradi1g09960	bHLH	Brasy2G324500
Bradi1g09960.5.p	Bradi1g09960	bHLH	Brasy2G324500
Bradi1g09960.6.p	Bradi1g09960	bHLH	Brasy2G324500
Bradi1g10170.2.p	Bradi1g10170	bHLH	Brasy2G322000
Bradi1g10170.3.p	Bradi1g10170	bHLH	Brasy2G322000
Bradi1g10170.4.p	Bradi1g10170	bHLH	Brasy2G322000
Bradi1g10330.1.p	Bradi1g10330	GRAS	Brasy2G319400
Bradi1g10610.1.p	Bradi1g10610	ZF-HD	Brasy2G316200
Bradi1g11060.1.p	Bradi1g11060	TCP	Brasy2G304000
Bradi1g11090.1.p	Bradi1g11090	GRAS	Brasy2G307300
Bradi1g11200.1.p	Bradi1g11200	GeBP	Brasy2G308500
Bradi1g11800.3.p	Bradi1g11800	NF-YA	Brasy2G294600
Bradi1g11800.4.p	Bradi1g11800	NF-YA	Brasy2G294600
Bradi1g11800.5.p	Bradi1g11800	NF-YA	Brasy2G294600
Bradi1g11800.6.p	Bradi1g11800	NF-YA	Brasy2G294600
Bradi1g12330.5.p	Bradi1g12330	GATA	Brasy2G288300
Bradi1g12620.1.p	Bradi1g12620	bZIP	Brasy2G283800
Bradi1g12770.2.p	Bradi1g12770	bHLH	Brasy7G060100
Bradi1g12780.4.p	Bradi1g12780	bHLH	Brasy7G060200
Bradi1g12900.1.p	Bradi1g12900	Trihelix	Brasy2G282900
Bradi1g13166.1.p	Bradi1g13166	LBD	Brasy2G279400
Bradi1g13207.1.p	Bradi1g13207	WRKY	Brasy2G278800
Bradi1g13310.1.p	Bradi1g13310	FAR1	Brasy2G277800
Bradi1g13570.2.p	Bradi1g13570	YABBY	Brasy2G273700
Bradi1g13570.3.p	Bradi1g13570	YABBY	Brasy2G273700
Bradi1g13570.4.p	Bradi1g13570	YABBY	Brasy2G273700
Bradi1g13570.5.p	Bradi1g13570	YABBY	Brasy2G273700
Bradi1g13570.6.p	Bradi1g13570	YABBY	Brasy2G273700
Bradi1g13570.7.p	Bradi1g13570	YABBY	Brasy2G273700
Bradi1g13570.8.p	Bradi1g13570	YABBY	Brasy2G273700
Bradi1g13680.1.p	Bradi1g13680	NF-YA	Brasy2G264100
Bradi1g13980.2.p	Bradi1g13980	bHLH	Brasy3G247600
Bradi1g14300.3.p	Bradi1g14300	WRKY	Brasy3G252800
Bradi1g14300.4.p	Bradi1g14300	WRKY	Brasy3G252800
Bradi1g14300.5.p	Bradi1g14300	WRKY	Brasy3G252800
Bradi1g14300.6.p	Bradi1g14300	WRKY	Brasy3G252800
Bradi1g14467.1.p	Bradi1g14467	NAC	Brasy3G256000
Bradi1g14467.2.p	Bradi1g14467	NAC	Brasy3G256000
Bradi1g14570.2.p	Bradi1g14570	Dof	Brasy2G258300
Bradi1g14600.1.p	Bradi1g14600	bHLH	Brasy2G258000
Bradi1g14677.10.p	Bradi1g14677	LBD	Brasy2G257000
Bradi1g14677.11.p	Bradi1g14677	LBD	Brasy2G257000
Bradi1g14677.12.p	Bradi1g14677	LBD	Brasy2G257000
Bradi1g14677.13.p	Bradi1g14677	LBD	Brasy2G257000
Bradi1g14677.14.p	Bradi1g14677	LBD	Brasy2G257000
Bradi1g14677.3.p	Bradi1g14677	LBD	Brasy2G257000
Bradi1g14677.5.p	Bradi1g14677	LBD	Brasy2G257000
Bradi1g14677.7.p	Bradi1g14677	LBD	Brasy2G257000
Bradi1g14677.8.p	Bradi1g14677	LBD	Brasy2G257000
Bradi1g14677.9.p	Bradi1g14677	LBD	Brasy2G257000
Bradi1g14780.1.p	Bradi1g14780	LBD	Brasy7G101000
Bradi1g15420.2.p	Bradi1g15420	Dof	Brasy2G247400
Bradi1g16120.2.p	Bradi1g16120	WRKY	Brasy5G315500
Bradi1g16120.3.p	Bradi1g16120	WRKY	Brasy5G315500
Bradi1g16120.4.p	Bradi1g16120	WRKY	Brasy5G315500
Bradi1g16120.5.p	Bradi1g16120	WRKY	Brasy5G315500
Bradi1g16120.6.p	Bradi1g16120	WRKY	Brasy5G315500
Bradi1g16120.7.p	Bradi1g16120	WRKY	Brasy5G315500
Bradi1g16120.8.p	Bradi1g16120	WRKY	Brasy5G315500
Bradi1g17210.2.p	Bradi1g17210	bZIP	Brasy6G008100
Bradi1g17210.3.p	Bradi1g17210	bZIP	Brasy6G008100
Bradi1g17335.1.p	Bradi1g17335	bZIP	Brasy6G009300
Bradi1g17335.2.p	Bradi1g17335	bZIP	Brasy6G009300
Bradi1g17410.1.p	Bradi1g17410	Dof	Brasy6G010200
Bradi1g17410.2.p	Bradi1g17410	Dof	Brasy6G010200
Bradi1g17410.3.p	Bradi1g17410	Dof	Brasy6G010200
Bradi1g17410.4.p	Bradi1g17410	Dof	Brasy6G010200
Bradi1g17410.5.p	Bradi1g17410	Dof	Brasy6G010200
Bradi1g17410.6.p	Bradi1g17410	Dof	Brasy6G010200
Bradi1g17440.1.p	Bradi1g17440	NAC	Brasy6G010800
Bradi1g17480.1.p	Bradi1g17480	NAC	Brasy6G011400
Bradi1g17660.1.p	Bradi1g17660	WRKY	Brasy6G013500
Bradi1g17660.2.p	Bradi1g17660	WRKY	Brasy6G013500
Bradi1g17700.1.p	Bradi1g17700	bZIP	Brasy6G013900
Bradi1g18400.1.p	Bradi1g18400	bHLH	Brasy6G024800
Bradi1g19702.1.p	Bradi1g19702	bZIP	Brasy6G042900
Bradi1g19740.1.p	Bradi1g19740	FAR1	Brasy7G150200
Bradi1g19900.1.p	Bradi1g19900	HSF	Brasy6G045300
Bradi1g19900.2.p	Bradi1g19900	HSF	Brasy6G045300
Bradi1g20063.2.p	Bradi1g20063	NAC	Brasy5G373500
Bradi1g20210.1.p	Bradi1g20210	GeBP	Brasy6G046700
Bradi1g20801.1.p	Bradi1g20801	NAC	Brasy6G054300
Bradi1g20830.1.p	Bradi1g20830	FAR1	Brasy6G054700
Bradi1g20830.3.p	Bradi1g20830	FAR1	Brasy6G054700
Bradi1g20830.4.p	Bradi1g20830	FAR1	Brasy6G054700
Bradi1g21372.1.p	Bradi1g21372	CAMTA	Brasy2G115700
Bradi1g21762.1.p	Bradi1g21762	NF-YA	Brasy6G062100
Bradi1g21900.1.p	Bradi1g21900	NF-YB	Brasy6G063800
Bradi1g22431.2.p	Bradi1g22431	FAR1	Brasy4G053500
Bradi1g22680.2.p	Bradi1g22680	WRKY	Brasy6G073300
Bradi1g22907.1.p	Bradi1g22907	GRAS	Brasy6G076600
Bradi1g22920.1.p	Bradi1g22920	LBD	Brasy6G076800
Bradi1g22960.1.p	Bradi1g22960	bHLH	Brasy6G077200
Bradi1g23060.1.p	Bradi1g23060	GRAS	Brasy6G078700
Bradi1g23090.1.p	Bradi1g23090	HRT-like	Brasy6G078900
Bradi1g23340.1.p	Bradi1g23340	WRKY	Brasy6G082400
Bradi1g23340.2.p	Bradi1g23340	WRKY	Brasy6G082400
Bradi1g23350.1.p	Bradi1g23350	GRAS	Brasy6G082500
Bradi1g24051.1.p	Bradi1g24051	YABBY	Brasy6G093000
Bradi1g24051.2.p	Bradi1g24051	YABBY	Brasy6G093000
Bradi1g24310.1.p	Bradi1g24310	GRAS	Brasy6G096800
Bradi1g24390.1.p	Bradi1g24390	NAC	Brasy6G098000
Bradi1g24390.2.p	Bradi1g24390	NAC	Brasy6G098000
Bradi1g24390.3.p	Bradi1g24390	NAC	Brasy6G098000
Bradi1g24700.4.p	Bradi1g24700	FAR1	Brasy6G110400
Bradi1g25230.1.p	Bradi1g25230	bHLH	Brasy6G118000
Bradi1g25230.2.p	Bradi1g25230	bHLH	Brasy6G118000
Bradi1g25370.1.p	Bradi1g25370	GRAS	Brasy6G119700
Bradi1g25370.2.p	Bradi1g25370	GRAS	Brasy6G119700
Bradi1g25470.1.p	Bradi1g25470	bHLH	BrasyJ095800
Bradi1g26570.1.p	Bradi1g26570	Dof	Brasy6G135500
Bradi1g26720.1.p	Bradi1g26720	SBP	Brasy6G137200
Bradi1g26960.1.p	Bradi1g26960	FAR1	Brasy6G141300
Bradi1g26960.2.p	Bradi1g26960	FAR1	Brasy6G141300
Bradi1g26960.3.p	Bradi1g26960	FAR1	Brasy6G141300
Bradi1g26980.1.p	Bradi1g26980	FAR1	Brasy6G141500
Bradi1g26980.2.p	Bradi1g26980	FAR1	Brasy6G141500
Bradi1g26980.3.p	Bradi1g26980	FAR1	Brasy6G141500
Bradi1g26980.4.p	Bradi1g26980	FAR1	Brasy6G141500
Bradi1g26980.5.p	Bradi1g26980	FAR1	Brasy6G141500
Bradi1g27170.1.p	Bradi1g27170	CAMTA	Brasy6G144300
Bradi1g29857.1.p	Bradi1g29857	NAC	Brasy7G223400
Bradi1g29920.1.p	Bradi1g29920	bZIP	Brasy7G222200
Bradi1g29920.2.p	Bradi1g29920	bZIP	Brasy7G222200
Bradi1g30000.1.p	Bradi1g30000	bHLH	Brasy7G221500
Bradi1g30000.2.p	Bradi1g30000	bHLH	Brasy7G221500
Bradi1g30140.1.p	Bradi1g30140	bZIP	Brasy1G529800
Bradi1g30750.1.p	Bradi1g30750	bZIP	Brasy7G216700
Bradi1g30870.1.p	Bradi1g30870	WRKY	Brasy7G215000
Bradi1g31391.2.p	Bradi1g31391	SBP	Brasy7G206800
Bradi1g31700.1.p	Bradi1g31700	bZIP	Brasy7G099000
Bradi1g31700.2.p	Bradi1g31700	bZIP	Brasy7G099000
Bradi1g31700.3.p	Bradi1g31700	bZIP	Brasy7G099000
Bradi1g31700.4.p	Bradi1g31700	bZIP	Brasy7G099000
Bradi1g31700.5.p	Bradi1g31700	bZIP	Brasy7G099000
Bradi1g32200.1.p	Bradi1g32200	NF-YC	Brasy7G201300
Bradi1g32660.1.p	Bradi1g32660	NAC	Brasy7G196700
Bradi1g33980.1.p	Bradi1g33980	GATA	Brasy9G049200
Bradi1g33980.2.p	Bradi1g33980	GATA	Brasy9G049200
Bradi1g34990.1.p	Bradi1g34990	SRS	Brasy7G176300
Bradi1g35322.2.p	Bradi1g35322	FAR1	Brasy4G053500
Bradi1g35322.3.p	Bradi1g35322	FAR1	Brasy4G053500
Bradi1g35552.1.p	Bradi1g35552	bZIP	Brasy7G170200
Bradi1g35790.1.p	Bradi1g35790	bZIP	Brasy7G166600
Bradi1g35990.1.p	Bradi1g35990	bHLH	Brasy7G161200
Bradi1g35990.2.p	Bradi1g35990	bHLH	Brasy7G161200
Bradi1g36180.2.p	Bradi1g36180	GRAS	Brasy7G159000
Bradi1g36750.2.p	Bradi1g36750	bZIP	Brasy7G151400
Bradi1g37480.1.p	Bradi1g37480	GATA	Brasy7G142700
Bradi1g37540.2.p	Bradi1g37540	bHLH	Brasy7G141900
Bradi1g37720.1.p	Bradi1g37720	HSF	Brasy7G139000
Bradi1g37898.1.p	Bradi1g37898	NAC	Brasy8G104900
Bradi1g37898.2.p	Bradi1g37898	NAC	Brasy8G104900
Bradi1g38140.1.p	Bradi1g38140	HSF	Brasy8G102300
Bradi1g38140.2.p	Bradi1g38140	HSF	Brasy8G102300
Bradi1g38180.1.p	Bradi1g38180	BES1	Brasy8G101800
Bradi1g38180.2.p	Bradi1g38180	BES1	Brasy8G101800
Bradi1g38650.1.p	Bradi1g38650	bHLH	Brasy8G097000
Bradi1g38730.1.p	Bradi1g38730	NAC	Brasy8G095600
Bradi1g38730.2.p	Bradi1g38730	NAC	Brasy8G095600
Bradi1g39472.1.p	Bradi1g39472	WRKY	Brasy2G236300
Bradi1g40407.2.p	Bradi1g40407	CPP	Brasy2G250900
Bradi1g40407.3.p	Bradi1g40407	CPP	Brasy2G250900
Bradi1g40407.4.p	Bradi1g40407	CPP	Brasy2G250900
Bradi1g40407.5.p	Bradi1g40407	CPP	Brasy2G250900
Bradi1g40407.6.p	Bradi1g40407	CPP	Brasy2G250900
Bradi1g40407.7.p	Bradi1g40407	CPP	Brasy2G250900
Bradi1g41712.2.p	Bradi1g41712	NAC	Brasy7G132500
Bradi1g41712.3.p	Bradi1g41712	NAC	Brasy7G132500
Bradi1g42440.1.p	Bradi1g42440	bHLH	Brasy7G125800
Bradi1g43460.1.p	Bradi1g43460	NF-YB	Brasy7G119400
Bradi1g43470.3.p	Bradi1g43470	NF-YB	Brasy7G119300
Bradi1g43650.1.p	Bradi1g43650	bHLH	Brasy7G116400
Bradi1g43650.2.p	Bradi1g43650	bHLH	Brasy7G116400
Bradi1g43661.1.p	Bradi1g43661	bZIP	Brasy7G116200
Bradi1g43840.1.p	Bradi1g43840	NAC	Brasy7G113600
Bradi1g43840.2.p	Bradi1g43840	NAC	Brasy7G113600
Bradi1g43840.3.p	Bradi1g43840	NAC	Brasy7G113600
Bradi1g43840.4.p	Bradi1g43840	NAC	Brasy7G113600
Bradi1g43840.5.p	Bradi1g43840	NAC	Brasy7G113600
Bradi1g43900.2.p	Bradi1g43900	bZIP	Brasy4G232600
Bradi1g43900.3.p	Bradi1g43900	bZIP	Brasy4G232600
Bradi1g43900.4.p	Bradi1g43900	bZIP	Brasy4G232600
Bradi1g44241.1.p	Bradi1g44241	FAR1	Brasy8G157200
Bradi1g44520.1.p	Bradi1g44520	E2F/DP	Brasy7G093900
Bradi1g45165.1.p	Bradi1g45165	Nin-like	Brasy7G085600
Bradi1g45220.2.p	Bradi1g45220	TCP	Brasy7G084800
Bradi1g45260.1.p	Bradi1g45260	bHLH	Brasy7G084500
Bradi1g46060.1.p	Bradi1g46060	bZIP	Brasy7G072800
Bradi1g46100.1.p	Bradi1g46100	bHLH	Brasy7G073200
Bradi1g46160.1.p	Bradi1g46160	GeBP	Brasy4G112100
Bradi1g46700.1.p	Bradi1g46700	bHLH	Brasy7G071800
Bradi1g46700.2.p	Bradi1g46700	bHLH	Brasy7G071800
Bradi1g47350.1.p	Bradi1g47350	bHLH	Brasy7G063600
Bradi1g47465.1.p	Bradi1g47465	FAR1	Brasy3G169700
Bradi1g47900.2.p	Bradi1g47900	GRAS	Brasy7G052800
Bradi1g48350.1.p	Bradi1g48350	FAR1	Brasy7G045600
Bradi1g48350.2.p	Bradi1g48350	FAR1	Brasy7G045600
Bradi1g48400.1.p	Bradi1g48400	bHLH	Brasy7G044900
Bradi1g48400.2.p	Bradi1g48400	bHLH	Brasy7G044900
Bradi1g48580.1.p	Bradi1g48580	NAC	Brasy1G061800
Bradi1g48770.3.p	Bradi1g48770	WRKY	Brasy7G039900
Bradi1g49630.1.p	Bradi1g49630	GRAS	Brasy7G034400
Bradi1g49980.10.p	Bradi1g49980	BBR-BPC	Brasy9G019200
Bradi1g50057.1.p	Bradi1g50057	NAC	Brasy9G018200
Bradi1g50057.2.p	Bradi1g50057	NAC	Brasy9G018200
Bradi1g51030.1.p	Bradi1g51030	WRKY	Brasy7G022000
Bradi1g51040.1.p	Bradi1g51040	Whirly	Brasy7G021900
Bradi1g52187.2.p	Bradi1g52187	NAC	Brasy7G003600
Bradi1g52187.3.p	Bradi1g52187	NAC	Brasy7G003600
Bradi1g52240.1.p	Bradi1g52240	GRAS	Brasy7G003100
Bradi1g52480.2.p	Bradi1g52480	NAC	Brasy7G000300
Bradi1g52480.3.p	Bradi1g52480	NAC	Brasy7G000300
Bradi1g53770.1.p	Bradi1g53770	NAC	Brasy6G179000
Bradi1g54111.3.p	Bradi1g54111	bHLH	Brasy6G183800
Bradi1g54111.4.p	Bradi1g54111	bHLH	Brasy6G183800
Bradi1g54180.1.p	Bradi1g54180	bZIP	Brasy6G196100
Bradi1g54180.2.p	Bradi1g54180	bZIP	Brasy6G196100
Bradi1g54180.3.p	Bradi1g54180	bZIP	Brasy6G196100
Bradi1g54180.4.p	Bradi1g54180	bZIP	Brasy6G196100
Bradi1g54690.1.p	Bradi1g54690	bHLH	Brasy6G188000
Bradi1g54690.2.p	Bradi1g54690	bHLH	Brasy6G188000
Bradi1g54690.3.p	Bradi1g54690	bHLH	Brasy6G188000
Bradi1g54690.4.p	Bradi1g54690	bHLH	Brasy6G188000
Bradi1g55427.1.p	Bradi1g55427	bHLH	Brasy6G198700
Bradi1g55427.2.p	Bradi1g55427	bHLH	Brasy6G198700
Bradi1g55427.3.p	Bradi1g55427	bHLH	Brasy6G198700
Bradi1g55446.1.p	Bradi1g55446	bZIP	Brasy6G199100
Bradi1g55630.2.p	Bradi1g55630	HSF	Brasy6G203300
Bradi1g55630.3.p	Bradi1g55630	HSF	Brasy6G203300
Bradi1g55710.1.p	Bradi1g55710	CPP	Brasy6G204600
Bradi1g55710.2.p	Bradi1g55710	CPP	Brasy6G204600
Bradi1g57070.1.p	Bradi1g57070	YABBY	Brasy6G223300
Bradi1g58057.1.p	Bradi1g58057	NAC	Brasy6G243200
Bradi1g58230.1.p	Bradi1g58230	bHLH	Brasy6G245300
Bradi1g58450.1.p	Bradi1g58450	TCP	Brasy6G249000
Bradi1g59180.2.p	Bradi1g59180	WRKY	Brasy6G262800
Bradi1g60030.1.p	Bradi1g60030	NF-YB	Brasy2G231700
Bradi1g60140.1.p	Bradi1g60140	GRAS	Brasy2G230200
Bradi1g60817.1.p	Bradi1g60817	CAMTA	Brasy3G170800
Bradi1g61110.1.p	Bradi1g61110	bHLH	Brasy3G053400
Bradi1g61110.2.p	Bradi1g61110	bHLH	Brasy3G053400
Bradi1g61477.1.p	Bradi1g61477	GeBP	Brasy2G218800
Bradi1g61620.1.p	Bradi1g61620	HSF	Brasy2G216900
Bradi1g61620.2.p	Bradi1g61620	HSF	Brasy2G216900
Bradi1g63170.1.p	Bradi1g63170	bZIP	Brasy2G204000
Bradi1g63220.1.p	Bradi1g63220	WRKY	Brasy2G203200
Bradi1g63600.1.p	Bradi1g63600	NAC	Brasy2G197700
Bradi1g63630.1.p	Bradi1g63630	NAC	Brasy2G197500
Bradi1g63780.1.p	Bradi1g63780	EIL	Brasy2G196000
Bradi1g63780.2.p	Bradi1g63780	EIL	Brasy2G196000
Bradi1g63840.1.p	Bradi1g63840	bZIP	Brasy2G195200
Bradi1g63910.1.p	Bradi1g63910	WRKY	Brasy2G194400
Bradi1g64060.1.p	Bradi1g64060	bZIP	Brasy2G192400
Bradi1g64060.3.p	Bradi1g64060	bZIP	Brasy2G192400
Bradi1g64550.1.p	Bradi1g64550	bZIP	Brasy2G187200
Bradi1g65760.1.p	Bradi1g65760	LBD	Brasy2G171300
Bradi1g66345.2.p	Bradi1g66345	bHLH	Brasy2G163000
Bradi1g66597.1.p	Bradi1g66597	Dof	Brasy2G159900
Bradi1g67340.1.p	Bradi1g67340	GRAS	Brasy2G150400
Bradi1g67500.1.p	Bradi1g67500	bHLH	Brasy2G147900
Bradi1g67740.1.p	Bradi1g67740	FAR1	Brasy2G145100
Bradi1g67770.1.p	Bradi1g67770	FAR1	Brasy2G144500
Bradi1g67980.2.p	Bradi1g67980	NF-YC	Brasy2G142100
Bradi1g67980.3.p	Bradi1g67980	NF-YC	Brasy2G142100
Bradi1g67980.4.p	Bradi1g67980	NF-YC	Brasy2G142100
Bradi1g68170.1.p	Bradi1g68170	LBD	Brasy2G127500
Bradi1g68560.2.p	Bradi1g68560	bZIP	Brasy2G122700
Bradi1g68560.3.p	Bradi1g68560	bZIP	Brasy2G122700
Bradi1g68560.4.p	Bradi1g68560	bZIP	Brasy2G122700
Bradi1g69110.2.p	Bradi1g69110	bHLH	Brasy2G117400
Bradi1g69110.3.p	Bradi1g69110	bHLH	Brasy2G117400
Bradi1g69110.4.p	Bradi1g69110	bHLH	Brasy2G117400
Bradi1g69110.5.p	Bradi1g69110	bHLH	Brasy2G117400
Bradi1g69407.1.p	Bradi1g69407	HSF	Brasy2G109500
Bradi1g69617.2.p	Bradi1g69617	NAC	Brasy2G107400
Bradi1g69617.3.p	Bradi1g69617	NAC	Brasy2G107400
Bradi1g69900.1.p	Bradi1g69900	YABBY	Brasy2G103800
Bradi1g69900.3.p	Bradi1g69900	YABBY	Brasy2G103800
Bradi1g69900.4.p	Bradi1g69900	YABBY	Brasy2G103800
Bradi1g69900.5.p	Bradi1g69900	YABBY	Brasy2G103800
Bradi1g70860.1.p	Bradi1g70860	bHLH	Brasy2G092800
Bradi1g71990.2.p	Bradi1g71990	bHLH	Brasy2G084800
Bradi1g72960.1.p	Bradi1g72960	NF-YA	Brasy2G493300
Bradi1g72960.2.p	Bradi1g72960	NF-YA	Brasy2G493300
Bradi1g72960.3.p	Bradi1g72960	NF-YA	Brasy2G493300
Bradi1g73013.1.p	Bradi1g73013	ZF-HD	Brasy2G492200
Bradi1g73016.1.p	Bradi1g73016	ZF-HD	Brasy2G492100
Bradi1g73026.1.p	Bradi1g73026	ZF-HD	Brasy2G491900
Bradi1g73140.1.p	Bradi1g73140	bHLH	Brasy2G490300
Bradi1g73710.1.p	Bradi1g73710	Dof	BrasyJ008500
Bradi1g74350.2.p	Bradi1g74350	HSF	Brasy2G361400
Bradi1g74350.3.p	Bradi1g74350	HSF	Brasy2G361400
Bradi1g74890.1.p	Bradi1g74890	E2F/DP	Brasy2G066000
Bradi1g74890.2.p	Bradi1g74890	E2F/DP	Brasy2G066000
Bradi1g75110.1.p	Bradi1g75110	LBD	Brasy2G063000
Bradi1g75120.1.p	Bradi1g75120	LBD	Brasy2G062900
Bradi1g75420.1.p	Bradi1g75420	GATA	Brasy2G058100
Bradi1g76030.1.p	Bradi1g76030	bHLH	Brasy2G051400
Bradi1g76207.2.p	Bradi1g76207	NAC	Brasy2G048400
Bradi1g76340.1.p	Bradi1g76340	Nin-like	Brasy2G045900
Bradi1g76340.2.p	Bradi1g76340	Nin-like	Brasy2G045900
Bradi1g76340.3.p	Bradi1g76340	Nin-like	Brasy2G045900
Bradi1g76340.4.p	Bradi1g76340	Nin-like	Brasy2G045900
Bradi1g76340.5.p	Bradi1g76340	Nin-like	Brasy2G045900
Bradi1g76440.1.p	Bradi1g76440	bHLH	Brasy2G044500
Bradi1g76690.1.p	Bradi1g76690	bZIP	Brasy2G041800
Bradi1g76732.1.p	Bradi1g76732	NAC	Brasy2G041200
Bradi1g76732.2.p	Bradi1g76732	NAC	Brasy2G041200
Bradi1g77070.1.p	Bradi1g77070	bHLH	Brasy2G036900
Bradi1g77217.1.p	Bradi1g77217	NAC	Brasy2G034600
Bradi1g77610.2.p	Bradi1g77610	Trihelix	Brasy2G027500
Bradi1g78230.1.p	Bradi1g78230	GRAS	Brasy2G018700
Bradi1g78540.1.p	Bradi1g78540	GATA	Brasy2G010400
Bradi2g00226.1.p	Bradi2g00226	NF-X1	Brasy1G363900
Bradi2g00720.1.p	Bradi2g00720	bHLH	Brasy3G132400
Bradi2g00730.1.p	Bradi2g00730	bHLH	Brasy3G132000
Bradi2g00740.1.p	Bradi2g00740	bHLH	Brasy3G131900
Bradi2g01000.1.p	Bradi2g01000	bHLH	Brasy1G563000
Bradi2g01000.2.p	Bradi2g01000	bHLH	Brasy1G563000
Bradi2g03427.1.p	Bradi2g03427	bHLH	Brasy1G499800
Bradi2g03427.2.p	Bradi2g03427	bHLH	Brasy1G499800
Bradi2g03427.3.p	Bradi2g03427	bHLH	Brasy1G499800
Bradi2g03448.1.p	Bradi2g03448	NAC	Brasy1G499600
Bradi2g03467.1.p	Bradi2g03467	NAC	Brasy1G499400
Bradi2g03830.2.p	Bradi2g03830	bHLH	Brasy1G495200
Bradi2g03830.3.p	Bradi2g03830	bHLH	Brasy1G495200
Bradi2g03830.4.p	Bradi2g03830	bHLH	Brasy1G495200
Bradi2g04270.2.p	Bradi2g04270	LBD	Brasy1G489000
Bradi2g04270.5.p	Bradi2g04270	LBD	Brasy1G489000
Bradi2g04270.6.p	Bradi2g04270	LBD	Brasy1G489000
Bradi2g04270.7.p	Bradi2g04270	LBD	Brasy1G489000
Bradi2g04270.8.p	Bradi2g04270	LBD	Brasy1G489000
Bradi2g04590.1.p	Bradi2g04590	bZIP	Brasy3G151900
Bradi2g04790.2.p	Bradi2g04790	BES1	Brasy3G271500
Bradi2g05234.2.p	Bradi2g05234	WRKY	Brasy1G482400
Bradi2g05280.1.p	Bradi2g05280	NF-YC	Brasy1G481900
Bradi2g05500.1.p	Bradi2g05500	WRKY	Brasy1G479500
Bradi2g05510.3.p	Bradi2g05510	WRKY	Brasy1G479400
Bradi2g05700.10.p	Bradi2g05700	NAC	Brasy1G477000
Bradi2g05700.2.p	Bradi2g05700	NAC	Brasy1G477000
Bradi2g05700.3.p	Bradi2g05700	NAC	Brasy1G477000
Bradi2g05700.4.p	Bradi2g05700	NAC	Brasy1G477000
Bradi2g05700.5.p	Bradi2g05700	NAC	Brasy1G477000
Bradi2g05700.6.p	Bradi2g05700	NAC	Brasy1G477000
Bradi2g05700.7.p	Bradi2g05700	NAC	Brasy1G477000
Bradi2g05700.8.p	Bradi2g05700	NAC	Brasy1G477000
Bradi2g05700.9.p	Bradi2g05700	NAC	Brasy1G477000
Bradi2g05794.1.p	Bradi2g05794	Dof	Brasy1G475900
Bradi2g05950.2.p	Bradi2g05950	bHLH	Brasy1G474000
Bradi2g06400.1.p	Bradi2g06400	BES1	Brasy1G468100
Bradi2g06790.2.p	Bradi2g06790	bZIP	Brasy1G463500
Bradi2g06790.3.p	Bradi2g06790	bZIP	Brasy1G463500
Bradi2g07050.1.p	Bradi2g07050	bHLH	Brasy1G460100
Bradi2g08080.1.p	Bradi2g08080	bHLH	Brasy1G434900
Bradi2g08080.2.p	Bradi2g08080	bHLH	Brasy1G434900
Bradi2g08177.1.p	Bradi2g08177	Nin-like	Brasy1G433600
Bradi2g08177.2.p	Bradi2g08177	Nin-like	Brasy1G433600
Bradi2g08366.1.p	Bradi2g08366	NAC	Brasy1G430500
Bradi2g08480.1.p	Bradi2g08480	LBD	Brasy1G416700
Bradi2g08600.1.p	Bradi2g08600	Nin-like	Brasy1G415200
Bradi2g08620.1.p	Bradi2g08620	WRKY	Brasy1G415000
Bradi2g08810.1.p	Bradi2g08810	GeBP	Brasy1G412400
Bradi2g09530.1.p	Bradi2g09530	NAC	Brasy1G388500
Bradi2g09720.1.p	Bradi2g09720	Dof	Brasy1G386100
Bradi2g10640.1.p	Bradi2g10640	Dof	Brasy1G374400
Bradi2g10640.2.p	Bradi2g10640	Dof	Brasy1G374400
Bradi2g10830.1.p	Bradi2g10830	bZIP	Brasy6G026300
Bradi2g10830.2.p	Bradi2g10830	bZIP	Brasy6G026300
Bradi2g11100.1.p	Bradi2g11100	bHLH	Brasy1G368500
Bradi2g11100.2.p	Bradi2g11100	bHLH	Brasy1G368500
Bradi2g11170.2.p	Bradi2g11170	WRKY	Brasy1G367200
Bradi2g11240.2.p	Bradi2g11240	SBP	Brasy1G365700
Bradi2g11240.3.p	Bradi2g11240	SBP	Brasy1G365700
Bradi2g11240.4.p	Bradi2g11240	SBP	Brasy1G365700
Bradi2g11260.1.p	Bradi2g11260	bHLH	Brasy9G002200
Bradi2g12030.2.p	Bradi2g12030	Trihelix	Brasy1G347000
Bradi2g12030.3.p	Bradi2g12030	Trihelix	Brasy1G347000
Bradi2g12490.1.p	Bradi2g12490	bHLH	Brasy1G344400
Bradi2g12590.1.p	Bradi2g12590	GATA	Brasy1G343100
Bradi2g14890.1.p	Bradi2g14890	GATA	Brasy8G013800
Bradi2g15360.1.p	Bradi2g15360	WRKY	Brasy8G018100
Bradi2g15405.1.p	Bradi2g15405	WRKY	Brasy8G018500
Bradi2g15800.6.p	Bradi2g15800	NF-YB	Brasy8G025800
Bradi2g15877.1.p	Bradi2g15877	WRKY	Brasy8G026600
Bradi2g15940.1.p	Bradi2g15940	bZIP	Brasy8G027400
Bradi2g15940.2.p	Bradi2g15940	bZIP	Brasy8G027400
Bradi2g15940.3.p	Bradi2g15940	bZIP	Brasy8G027400
Bradi2g16150.1.p	Bradi2g16150	WRKY	Brasy8G030600
Bradi2g16357.2.p	Bradi2g16357	WRKY	Brasy2G054700
Bradi2g16780.2.p	Bradi2g16780	Trihelix	Brasy2G138200
Bradi2g16780.3.p	Bradi2g16780	Trihelix	Brasy2G138200
Bradi2g18200.1.p	Bradi2g18200	bHLH	Brasy1G324700
Bradi2g18530.1.p	Bradi2g18530	WRKY	Brasy8G049700
Bradi2g18980.2.p	Bradi2g18980	HSF	Brasy8G056200
Bradi2g18980.3.p	Bradi2g18980	HSF	Brasy8G056200
Bradi2g18980.4.p	Bradi2g18980	HSF	Brasy8G056200
Bradi2g19070.1.p	Bradi2g19070	WRKY	Brasy8G057400
Bradi2g19480.1.p	Bradi2g19480	GATA	Brasy8G063100
Bradi2g19480.2.p	Bradi2g19480	GATA	Brasy8G063100
Bradi2g19820.1.p	Bradi2g19820	VOZ	Brasy8G067700
Bradi2g19930.1.p	Bradi2g19930	Dof	Brasy8G068700
Bradi2g20060.2.p	Bradi2g20060	TCP	Brasy8G070100
Bradi2g20060.3.p	Bradi2g20060	TCP	Brasy8G070100
Bradi2g20060.4.p	Bradi2g20060	TCP	Brasy8G070100
Bradi2g20060.5.p	Bradi2g20060	TCP	Brasy8G070100
Bradi2g20347.1.p	Bradi2g20347	CPP	Brasy8G073400
Bradi2g20590.1.p	Bradi2g20590	NAC	Brasy8G077600
Bradi2g20720.2.p	Bradi2g20720	bHLH	Brasy8G079000
Bradi2g20720.3.p	Bradi2g20720	bHLH	Brasy8G079000
Bradi2g20720.4.p	Bradi2g20720	bHLH	Brasy8G079000
Bradi2g20760.1.p	Bradi2g20760	GRAS	Brasy8G079300
Bradi2g21197.1.p	Bradi2g21197	bZIP	Brasy8G084500
Bradi2g21255.1.p	Bradi2g21255	FAR1	Brasy4G041700
Bradi2g21290.1.p	Bradi2g21290	NF-YC	Brasy8G085600
Bradi2g21380.1.p	Bradi2g21380	bZIP	Brasy8G086800
Bradi2g21473.1.p	Bradi2g21473	FAR1	Brasy9G315300
Bradi2g21820.1.p	Bradi2g21820	bZIP	Brasy8G089000
Bradi2g21820.2.p	Bradi2g21820	bZIP	Brasy8G089000
Bradi2g22010.1.p	Bradi2g22010	GRAS	Brasy8G090700
Bradi2g22230.1.p	Bradi2g22230	WRKY	Brasy8G107900
Bradi2g22241.1.p	Bradi2g22241	WRKY	Brasy8G108000
Bradi2g22440.1.p	Bradi2g22440	WRKY	Brasy8G110400
Bradi2g22440.2.p	Bradi2g22440	WRKY	Brasy8G110400
Bradi2g22440.5.p	Bradi2g22440	WRKY	Brasy8G110400
Bradi2g22810.1.p	Bradi2g22810	bHLH	Brasy8G115000
Bradi2g22940.1.p	Bradi2g22940	NF-YB	Brasy8G116000
Bradi2g22940.2.p	Bradi2g22940	NF-YB	Brasy8G116000
Bradi2g23520.1.p	Bradi2g23520	bHLH	Brasy8G122600
Bradi2g23890.4.p	Bradi2g23890	bZIP	Brasy4G410300
Bradi2g23967.1.p	Bradi2g23967	NAC	Brasy4G409000
Bradi2g24040.1.p	Bradi2g24040	Dof	Brasy4G408100
Bradi2g24120.3.p	Bradi2g24120	bZIP	Brasy8G127000
Bradi2g24790.1.p	Bradi2g24790	NAC	Brasy1G523100
Bradi2g24790.2.p	Bradi2g24790	NAC	Brasy1G523100
Bradi2g24987.1.p	Bradi2g24987	NAC	Brasy8G132500
Bradi2g24987.2.p	Bradi2g24987	NAC	Brasy8G132500
Bradi2g25150.1.p	Bradi2g25150	NAC	Brasy9G242000
Bradi2g25270.2.p	Bradi2g25270	LBD	Brasy8G140800
Bradi2g25270.3.p	Bradi2g25270	LBD	Brasy8G140800
Bradi2g25400.1.p	Bradi2g25400	bZIP	Brasy8G139000
Bradi2g25400.2.p	Bradi2g25400	bZIP	Brasy8G139000
Bradi2g25580.1.p	Bradi2g25580	SBP	Brasy8G136900
Bradi2g26823.1.p	Bradi2g26823	SRS	Brasy8G159500
Bradi2g26823.2.p	Bradi2g26823	SRS	Brasy8G159500
Bradi2g27040.1.p	Bradi2g27040	FAR1	Brasy1G397000
Bradi2g27040.2.p	Bradi2g27040	FAR1	Brasy1G397000
Bradi2g30695.1.p	Bradi2g30695	WRKY	Brasy8G176600
Bradi2g30800.2.p	Bradi2g30800	WRKY	Brasy8G176900
Bradi2g31180.2.p	Bradi2g31180	FAR1	Brasy4G053500
Bradi2g31180.3.p	Bradi2g31180	FAR1	Brasy4G053500
Bradi2g31710.1.p	Bradi2g31710	Nin-like	Brasy8G244900
Bradi2g31710.2.p	Bradi2g31710	Nin-like	Brasy8G244900
Bradi2g31710.3.p	Bradi2g31710	Nin-like	Brasy8G244900
Bradi2g33307.2.p	Bradi2g33307	NAC	Brasy3G108300
Bradi2g33540.1.p	Bradi2g33540	WRKY	BrasyJ113300
Bradi2g34520.1.p	Bradi2g34520	LBD	Brasy8G193900
Bradi2g34520.2.p	Bradi2g34520	LBD	Brasy8G193900
Bradi2g34600.1.p	Bradi2g34600	bHLH	Brasy8G195000
Bradi2g35057.1.p	Bradi2g35057	GATA	Brasy8G211000
Bradi2g36740.1.p	Bradi2g36740	bHLH	Brasy8G248800
Bradi2g37130.1.p	Bradi2g37130	Dof	Brasy8G255300
Bradi2g37961.1.p	Bradi2g37961	LBD	Brasy8G268400
Bradi2g38230.2.p	Bradi2g38230	Trihelix	Brasy8G272100
Bradi2g38230.4.p	Bradi2g38230	Trihelix	Brasy8G272100
Bradi2g38380.1.p	Bradi2g38380	bZIP	Brasy8G276500
Bradi2g39970.1.p	Bradi2g39970	bHLH	Brasy1G250800
Bradi2g40920.1.p	Bradi2g40920	Nin-like	Brasy1G311100
Bradi2g41390.1.p	Bradi2g41390	bHLH	Brasy1G304300
Bradi2g41530.1.p	Bradi2g41530	HSF	Brasy4G183700
Bradi2g41670.1.p	Bradi2g41670	bHLH	Brasy4G181600
Bradi2g42023.1.p	Bradi2g42023	WRKY	Brasy1G299400
Bradi2g43340.3.p	Bradi2g43340	CPP	Brasy1G277900
Bradi2g44035.1.p	Bradi2g44035	WRKY	Brasy8G135500
Bradi2g44050.1.p	Bradi2g44050	HSF	Brasy8G135800
Bradi2g44050.2.p	Bradi2g44050	HSF	Brasy8G135800
Bradi2g44090.1.p	Bradi2g44090	WRKY	Brasy1G275500
Bradi2g44090.2.p	Bradi2g44090	WRKY	Brasy1G275500
Bradi2g44117.10.p	Bradi2g44117	bHLH	Brasy1G275200
Bradi2g44117.1.p	Bradi2g44117	bHLH	Brasy1G275200
Bradi2g44117.2.p	Bradi2g44117	bHLH	Brasy1G275200
Bradi2g44117.4.p	Bradi2g44117	bHLH	Brasy1G275200
Bradi2g44117.6.p	Bradi2g44117	bHLH	Brasy1G275200
Bradi2g44117.7.p	Bradi2g44117	bHLH	Brasy1G275200
Bradi2g44117.8.p	Bradi2g44117	bHLH	Brasy1G275200
Bradi2g44117.9.p	Bradi2g44117	bHLH	Brasy1G275200
Bradi2g44270.1.p	Bradi2g44270	WRKY	Brasy1G274000
Bradi2g44270.2.p	Bradi2g44270	WRKY	Brasy1G274000
Bradi2g44540.1.p	Bradi2g44540	ZF-HD	Brasy9G213300
Bradi2g45117.1.p	Bradi2g45117	GRAS	Brasy1G271400
Bradi2g45480.1.p	Bradi2g45480	WRKY	Brasy1G267100
Bradi2g45480.2.p	Bradi2g45480	WRKY	Brasy1G267100
Bradi2g45567.1.p	Bradi2g45567	bZIP	Brasy2G468300
Bradi2g45750.1.p	Bradi2g45750	GATA	Brasy2G465800
Bradi2g45900.1.p	Bradi2g45900	WRKY	Brasy2G464300
Bradi2g46197.2.p	Bradi2g46197	NAC	Brasy1G261100
Bradi2g46197.3.p	Bradi2g46197	NAC	Brasy1G261100
Bradi2g46197.4.p	Bradi2g46197	NAC	Brasy1G261100
Bradi2g46197.5.p	Bradi2g46197	NAC	Brasy1G261100
Bradi2g46320.1.p	Bradi2g46320	Trihelix	Brasy1G259600
Bradi2g46320.2.p	Bradi2g46320	Trihelix	Brasy1G259600
Bradi2g46427.1.p	Bradi2g46427	NAC	Brasy1G258200
Bradi2g46527.2.p	Bradi2g46527	E2F/DP	Brasy1G257000
Bradi2g46527.3.p	Bradi2g46527	E2F/DP	Brasy1G257000
Bradi2g46980.1.p	Bradi2g46980	NAC	Brasy1G238600
Bradi2g47730.1.p	Bradi2g47730	bHLH	Brasy1G226800
Bradi2g47810.1.p	Bradi2g47810	bHLH	Brasy1G225900
Bradi2g48090.1.p	Bradi2g48090	WRKY	Brasy1G222600
Bradi2g48320.1.p	Bradi2g48320	Trihelix	Brasy1G219900
Bradi2g48320.2.p	Bradi2g48320	Trihelix	Brasy1G219900
Bradi2g48907.1.p	Bradi2g48907	WRKY	Brasy1G212900
Bradi2g48990.1.p	Bradi2g48990	HSF	Brasy1G400900
Bradi2g49020.1.p	Bradi2g49020	WRKY	Brasy1G212200
Bradi2g49620.1.p	Bradi2g49620	GATA	Brasy1G204200
Bradi2g49860.1.p	Bradi2g49860	HSF	Brasy1G200500
Bradi2g49860.3.p	Bradi2g49860	HSF	Brasy1G200500
Bradi2g49860.4.p	Bradi2g49860	HSF	Brasy1G200500
Bradi2g49906.1.p	Bradi2g49906	WRKY	Brasy1G199900
Bradi2g49906.2.p	Bradi2g49906	WRKY	Brasy1G199900
Bradi2g50070.1.p	Bradi2g50070	VOZ	Brasy1G197800
Bradi2g50220.1.p	Bradi2g50220	bZIP	Brasy1G195300
Bradi2g50370.1.p	Bradi2g50370	Dof	Brasy1G193800
Bradi2g50540.1.p	Bradi2g50540	CPP	Brasy1G192000
Bradi2g50540.2.p	Bradi2g50540	CPP	Brasy1G192000
Bradi2g50540.3.p	Bradi2g50540	CPP	Brasy1G192000
Bradi2g50540.4.p	Bradi2g50540	CPP	Brasy1G192000
Bradi2g50540.5.p	Bradi2g50540	CPP	Brasy1G192000
Bradi2g50540.6.p	Bradi2g50540	CPP	Brasy1G192000
Bradi2g50540.7.p	Bradi2g50540	CPP	Brasy1G192000
Bradi2g50540.8.p	Bradi2g50540	CPP	Brasy1G192000
Bradi2g50687.1.p	Bradi2g50687	TCP	Brasy1G190400
Bradi2g50687.2.p	Bradi2g50687	TCP	Brasy1G190400
Bradi2g51310.2.p	Bradi2g51310	LBD	Brasy1G181400
Bradi2g51310.3.p	Bradi2g51310	LBD	Brasy1G181400
Bradi2g51310.4.p	Bradi2g51310	LBD	Brasy1G181400
Bradi2g51990.1.p	Bradi2g51990	bHLH	Brasy1G165400
Bradi2g51990.3.p	Bradi2g51990	bHLH	Brasy1G165400
Bradi2g52227.1.p	Bradi2g52227	GRAS	Brasy1G159800
Bradi2g52590.3.p	Bradi2g52590	bZIP	Brasy1G154800
Bradi2g52590.4.p	Bradi2g52590	bZIP	Brasy1G154800
Bradi2g52860.1.p	Bradi2g52860	bZIP	Brasy1G147600
Bradi2g53060.2.p	Bradi2g53060	bZIP	Brasy1G145100
Bradi2g53060.3.p	Bradi2g53060	bZIP	Brasy1G145100
Bradi2g53060.4.p	Bradi2g53060	bZIP	Brasy1G145100
Bradi2g53060.5.p	Bradi2g53060	bZIP	Brasy1G145100
Bradi2g53060.6.p	Bradi2g53060	bZIP	Brasy1G145100
Bradi2g53260.1.p	Bradi2g53260	NAC	Brasy8G146600
Bradi2g53486.1.p	Bradi2g53486	WRKY	Brasy1G143000
Bradi2g53495.1.p	Bradi2g53495	WRKY	Brasy1G142900
Bradi2g53510.2.p	Bradi2g53510	WRKY	Brasy1G142500
Bradi2g53510.3.p	Bradi2g53510	WRKY	Brasy1G142500
Bradi2g53520.1.p	Bradi2g53520	WRKY	Brasy1G142400
Bradi2g53690.1.p	Bradi2g53690	LBD	Brasy1G140100
Bradi2g53760.1.p	Bradi2g53760	WRKY	Brasy1G139400
Bradi2g54030.1.p	Bradi2g54030	bHLH	Brasy1G135700
Bradi2g54200.2.p	Bradi2g54200	NF-YB	Brasy1G133800
Bradi2g54200.3.p	Bradi2g54200	NF-YB	Brasy1G133800
Bradi2g54200.4.p	Bradi2g54200	NF-YB	Brasy1G133800
Bradi2g54670.5.p	Bradi2g54670	GRAS	Brasy1G128400
Bradi2g54670.6.p	Bradi2g54670	GRAS	Brasy1G128400
Bradi2g54670.7.p	Bradi2g54670	GRAS	Brasy1G128400
Bradi2g54670.8.p	Bradi2g54670	GRAS	Brasy1G128400
Bradi2g54720.2.p	Bradi2g54720	WRKY	Brasy1G127800
Bradi2g54720.3.p	Bradi2g54720	WRKY	Brasy1G127800
Bradi2g55550.1.p	Bradi2g55550	bZIP	Brasy1G116500
Bradi2g55567.2.p	Bradi2g55567	bZIP	Brasy1G116200
Bradi2g55567.3.p	Bradi2g55567	bZIP	Brasy1G116200
Bradi2g55567.4.p	Bradi2g55567	bZIP	Brasy1G116200
Bradi2g55567.6.p	Bradi2g55567	bZIP	Brasy1G116200
Bradi2g55567.7.p	Bradi2g55567	bZIP	Brasy1G116200
Bradi2g55567.8.p	Bradi2g55567	bZIP	Brasy1G116200
Bradi2g55567.9.p	Bradi2g55567	bZIP	Brasy1G116200
Bradi2g55780.1.p	Bradi2g55780	NAC	Brasy1G111900
Bradi2g55980.1.p	Bradi2g55980	Dof	Brasy1G109700
Bradi2g56096.1.p	Bradi2g56096	bZIP	Brasy1G108400
Bradi2g56910.1.p	Bradi2g56910	GRAS	Brasy1G099300
Bradi2g57100.1.p	Bradi2g57100	NAC	Brasy1G097200
Bradi2g57297.1.p	Bradi2g57297	NAC	Brasy1G093100
Bradi2g57297.2.p	Bradi2g57297	NAC	Brasy1G093100
Bradi2g57380.2.p	Bradi2g57380	LBD	Brasy1G091800
Bradi2g57380.3.p	Bradi2g57380	LBD	Brasy1G091800
Bradi2g57800.1.p	Bradi2g57800	bHLH	Brasy1G085100
Bradi2g57800.2.p	Bradi2g57800	bHLH	Brasy1G085100
Bradi2g57800.3.p	Bradi2g57800	bHLH	Brasy1G085100
Bradi2g57800.4.p	Bradi2g57800	bHLH	Brasy1G085100
Bradi2g57800.5.p	Bradi2g57800	bHLH	Brasy1G085100
Bradi2g57800.6.p	Bradi2g57800	bHLH	Brasy1G085100
Bradi2g57800.7.p	Bradi2g57800	bHLH	Brasy1G085100
Bradi2g57940.1.p	Bradi2g57940	GRAS	Brasy1G083200
Bradi2g58630.2.p	Bradi2g58630	bHLH	Brasy1G074800
Bradi2g59110.1.p	Bradi2g59110	SBP	Brasy1G065200
Bradi2g59110.2.p	Bradi2g59110	SBP	Brasy1G065200
Bradi2g59137.1.p	Bradi2g59137	CAMTA	Brasy1G064200
Bradi2g59137.2.p	Bradi2g59137	CAMTA	Brasy1G064200
Bradi2g59137.3.p	Bradi2g59137	CAMTA	Brasy1G064200
Bradi2g59137.4.p	Bradi2g59137	CAMTA	Brasy1G064200
Bradi2g59240.1.p	Bradi2g59240	TCP	Brasy1G062700
Bradi2g59240.2.p	Bradi2g59240	TCP	Brasy1G062700
Bradi2g59440.2.p	Bradi2g59440	Trihelix	Brasy1G060400
Bradi2g59497.2.p	Bradi2g59497	bHLH	Brasy1G059700
Bradi2g60030.3.p	Bradi2g60030	NF-YB	Brasy1G051900
Bradi2g60050.1.p	Bradi2g60050	NF-YB	Brasy1G051800
Bradi2g60620.1.p	Bradi2g60620	NAC	Brasy1G032900
Bradi2g60750.1.p	Bradi2g60750	GRAS	Brasy1G031400
Bradi2g60750.2.p	Bradi2g60750	GRAS	Brasy1G031400
Bradi2g61050.1.p	Bradi2g61050	bHLH	Brasy1G027700
Bradi2g61050.2.p	Bradi2g61050	bHLH	Brasy1G027700
Bradi2g61120.1.p	Bradi2g61120	SRS	Brasy1G026100
Bradi2g61120.2.p	Bradi2g61120	SRS	Brasy1G026100
Bradi2g61760.1.p	Bradi2g61760	Nin-like	Brasy1G016000
Bradi2g62131.1.p	Bradi2g62131	WRKY	Brasy1G008200
Bradi2g62380.2.p	Bradi2g62380	Dof	Brasy1G005300
Bradi2g62660.1.p	Bradi2g62660	GATA	Brasy1G001900
Bradi3g00300.1.p	Bradi3g00300	bZIP	Brasy4G440500
Bradi3g00697.1.p	Bradi3g00697	Trihelix	Brasy4G435000
Bradi3g01540.1.p	Bradi3g01540	bHLH	Brasy4G420400
Bradi3g01901.3.p	Bradi3g01901	bHLH	Brasy4G415800
Bradi3g01901.4.p	Bradi3g01901	bHLH	Brasy4G415800
Bradi3g01901.5.p	Bradi3g01901	bHLH	Brasy4G415800
Bradi3g01901.6.p	Bradi3g01901	bHLH	Brasy4G415800
Bradi3g01901.7.p	Bradi3g01901	bHLH	Brasy4G415800
Bradi3g01910.1.p	Bradi3g01910	bHLH	Brasy4G415600
Bradi3g01910.2.p	Bradi3g01910	bHLH	Brasy4G415600
Bradi3g02730.1.p	Bradi3g02730	bZIP	Brasy4G405900
Bradi3g02730.2.p	Bradi3g02730	bZIP	Brasy4G405900
Bradi3g02730.3.p	Bradi3g02730	bZIP	Brasy4G405900
Bradi3g02730.4.p	Bradi3g02730	bZIP	Brasy4G405900
Bradi3g02730.5.p	Bradi3g02730	bZIP	Brasy4G405900
Bradi3g02800.1.p	Bradi3g02800	BES1	Brasy4G404700
Bradi3g02800.2.p	Bradi3g02800	BES1	Brasy4G404700
Bradi3g02800.3.p	Bradi3g02800	BES1	Brasy4G404700
Bradi3g02800.4.p	Bradi3g02800	BES1	Brasy4G404700
Bradi3g02980.1.p	Bradi3g02980	bZIP	Brasy4G402300
Bradi3g03170.1.p	Bradi3g03170	Nin-like	Brasy4G400000
Bradi3g03510.2.p	Bradi3g03510	SBP	Brasy4G391700
Bradi3g03510.3.p	Bradi3g03510	SBP	Brasy4G391700
Bradi3g03510.4.p	Bradi3g03510	SBP	Brasy4G391700
Bradi3g03510.5.p	Bradi3g03510	SBP	Brasy4G391700
Bradi3g03510.6.p	Bradi3g03510	SBP	Brasy4G391700
Bradi3g03510.7.p	Bradi3g03510	SBP	Brasy4G391700
Bradi3g03800.1.p	Bradi3g03800	GATA	Brasy4G386900
Bradi3g03810.2.p	Bradi3g03810	GATA	Brasy4G386700
Bradi3g04450.1.p	Bradi3g04450	Whirly	Brasy4G374800
Bradi3g05270.1.p	Bradi3g05270	NF-YC	Brasy4G362700
Bradi3g05510.1.p	Bradi3g05510	SBP	Brasy4G352300
Bradi3g05510.2.p	Bradi3g05510	SBP	Brasy4G352300
Bradi3g05530.1.p	Bradi3g05530	Trihelix	Brasy4G352100
Bradi3g05577.1.p	Bradi3g05577	bZIP	Brasy4G351300
Bradi3g05720.1.p	Bradi3g05720	SBP	Brasy4G349400
Bradi3g06070.1.p	Bradi3g06070	WRKY	Brasy4G345100
Bradi3g06160.1.p	Bradi3g06160	bZIP	Brasy4G343000
Bradi3g06670.1.p	Bradi3g06670	bZIP	Brasy4G336200
Bradi3g07031.1.p	Bradi3g07031	bZIP	Brasy4G331300
Bradi3g07031.2.p	Bradi3g07031	bZIP	Brasy4G331300
Bradi3g07160.1.p	Bradi3g07160	GRAS	Brasy4G329700
Bradi3g07540.1.p	Bradi3g07540	bZIP	Brasy4G323400
Bradi3g08240.3.p	Bradi3g08240	GATA	Brasy4G296400
Bradi3g08280.1.p	Bradi3g08280	bHLH	Brasy4G295900
Bradi3g08810.1.p	Bradi3g08810	bHLH	Brasy4G288300
Bradi3g08870.1.p	Bradi3g08870	HSF	Brasy4G287300
Bradi3g08967.1.p	Bradi3g08967	BES1	Brasy4G286200
Bradi3g09340.1.p	Bradi3g09340	bZIP	Brasy4G277700
Bradi3g09520.2.p	Bradi3g09520	NAC	Brasy4G272100
Bradi3g09520.3.p	Bradi3g09520	NAC	Brasy4G272100
Bradi3g09670.1.p	Bradi3g09670	bHLH	Brasy4G270300
Bradi3g09810.1.p	Bradi3g09810	WRKY	Brasy4G268300
Bradi3g10190.1.p	Bradi3g10190	CPP	Brasy4G263400
Bradi3g10416.1.p	Bradi3g10416	FAR1	Brasy4G251500
Bradi3g10422.2.p	Bradi3g10422	FAR1	Brasy4G251600
Bradi3g10422.3.p	Bradi3g10422	FAR1	Brasy4G251600
Bradi3g10422.4.p	Bradi3g10422	FAR1	Brasy4G251600
Bradi3g10437.2.p	Bradi3g10437	FAR1	Brasy4G251900
Bradi3g10437.3.p	Bradi3g10437	FAR1	Brasy4G251900
Bradi3g10450.1.p	Bradi3g10450	FAR1	Brasy4G252000
Bradi3g10450.3.p	Bradi3g10450	FAR1	Brasy4G252000
Bradi3g10450.4.p	Bradi3g10450	FAR1	Brasy4G252000
Bradi3g10450.5.p	Bradi3g10450	FAR1	Brasy4G252000
Bradi3g11520.1.p	Bradi3g11520	bHLH	Brasy4G246000
Bradi3g12470.1.p	Bradi3g12470	NAC	Brasy3G347600
Bradi3g12550.1.p	Bradi3g12550	LBD	Brasy3G348800
Bradi3g13117.1.p	Bradi3g13117	NAC	Brasy3G080600
Bradi3g13117.2.p	Bradi3g13117	NAC	Brasy3G080600
Bradi3g13300.1.p	Bradi3g13300	bHLH	Brasy3G077500
Bradi3g13630.1.p	Bradi3g13630	NAC	Brasy3G073400
Bradi3g13727.1.p	Bradi3g13727	NAC	Brasy3G072000
Bradi3g14240.1.p	Bradi3g14240	SRS	Brasy3G063500
Bradi3g14590.1.p	Bradi3g14590	bHLH	Brasy3G058500
Bradi3g15440.1.p	Bradi3g15440	bHLH	Brasy3G041000
Bradi3g15590.1.p	Bradi3g15590	bZIP	Brasy3G039400
Bradi3g15670.1.p	Bradi3g15670	NF-YB	Brasy3G038400
Bradi3g16121.10.p	Bradi3g16121	FAR1	Brasy3G031500
Bradi3g16121.11.p	Bradi3g16121	FAR1	Brasy3G031500
Bradi3g16121.2.p	Bradi3g16121	FAR1	Brasy3G031500
Bradi3g16121.3.p	Bradi3g16121	FAR1	Brasy3G031500
Bradi3g16121.5.p	Bradi3g16121	FAR1	Brasy3G031500
Bradi3g16121.6.p	Bradi3g16121	FAR1	Brasy3G031500
Bradi3g16121.7.p	Bradi3g16121	FAR1	Brasy3G031500
Bradi3g16121.8.p	Bradi3g16121	FAR1	Brasy3G031500
Bradi3g16121.9.p	Bradi3g16121	FAR1	Brasy3G031500
Bradi3g16140.3.p	Bradi3g16140	GeBP	Brasy3G031100
Bradi3g16480.1.p	Bradi3g16480	NAC	Brasy3G026600
Bradi3g17287.1.p	Bradi3g17287	NAC	Brasy3G012100
Bradi3g17357.3.p	Bradi3g17357	NF-YB	Brasy3G011300
Bradi3g17357.4.p	Bradi3g17357	NF-YB	Brasy3G011300
Bradi3g17357.5.p	Bradi3g17357	NF-YB	Brasy3G011300
Bradi3g17539.1.p	Bradi3g17539	Trihelix	Brasy3G006700
Bradi3g17573.1.p	Bradi3g17573	NAC	Brasy3G007400
Bradi3g17790.2.p	Bradi3g17790	NF-YC	Brasy3G002800
Bradi3g17790.3.p	Bradi3g17790	NF-YC	Brasy3G002800
Bradi3g17810.1.p	Bradi3g17810	NF-YC	Brasy3G002700
Bradi3g17815.1.p	Bradi3g17815	NF-YC	Brasy3G002600
Bradi3g18580.1.p	Bradi3g18580	WRKY	Brasy3G091600
Bradi3g19640.1.p	Bradi3g19640	WRKY	Brasy3G106400
Bradi3g19640.2.p	Bradi3g19640	WRKY	Brasy3G106400
Bradi3g19640.3.p	Bradi3g19640	WRKY	Brasy3G106400
Bradi3g20610.1.p	Bradi3g20610	GeBP	Brasy3G120400
Bradi3g21380.1.p	Bradi3g21380	BBR-BPC	Brasy2G271700
Bradi3g21390.1.p	Bradi3g21390	BBR-BPC	Brasy2G271800
Bradi3g21390.2.p	Bradi3g21390	BBR-BPC	Brasy2G271800
Bradi3g21460.10.p	Bradi3g21460	bHLH	Brasy2G272600
Bradi3g21460.11.p	Bradi3g21460	bHLH	Brasy2G272600
Bradi3g21460.12.p	Bradi3g21460	bHLH	Brasy2G272600
Bradi3g21460.13.p	Bradi3g21460	bHLH	Brasy2G272600
Bradi3g21460.1.p	Bradi3g21460	bHLH	Brasy2G272600
Bradi3g21460.2.p	Bradi3g21460	bHLH	Brasy2G272600
Bradi3g21460.5.p	Bradi3g21460	bHLH	Brasy2G272600
Bradi3g21460.7.p	Bradi3g21460	bHLH	Brasy2G272600
Bradi3g21460.8.p	Bradi3g21460	bHLH	Brasy2G272600
Bradi3g21460.9.p	Bradi3g21460	bHLH	Brasy2G272600
Bradi3g22040.1.p	Bradi3g22040	bZIP	Brasy3G137100
Bradi3g22510.1.p	Bradi3g22510	LBD	Brasy3G138400
Bradi3g23800.1.p	Bradi3g23800	CAMTA	Brasy4G226700
Bradi3g23800.2.p	Bradi3g23800	CAMTA	Brasy4G226700
Bradi3g24210.2.p	Bradi3g24210	GRAS	Brasy4G227400
Bradi3g24210.3.p	Bradi3g24210	GRAS	Brasy4G227400
Bradi3g25670.1.p	Bradi3g25670	Dof	Brasy4G241400
Bradi3g26665.1.p	Bradi3g26665	NAC	Brasy3G146900
Bradi3g26920.4.p	Bradi3g26920	HSF	Brasy3G155300
Bradi3g26920.6.p	Bradi3g26920	HSF	Brasy3G155300
Bradi3g26920.8.p	Bradi3g26920	HSF	Brasy3G155300
Bradi3g27520.1.p	Bradi3g27520	E2F/DP	Brasy3G162200
Bradi3g27520.2.p	Bradi3g27520	E2F/DP	Brasy3G162200
Bradi3g27520.3.p	Bradi3g27520	E2F/DP	Brasy3G162200
Bradi3g27520.4.p	Bradi3g27520	E2F/DP	Brasy3G162200
Bradi3g27520.5.p	Bradi3g27520	E2F/DP	Brasy3G162200
Bradi3g28003.1.p	Bradi3g28003	GATA	Brasy4G239400
Bradi3g29940.1.p	Bradi3g29940	Dof	Brasy3G181900
Bradi3g30410.1.p	Bradi3g30410	YABBY	Brasy3G188200
Bradi3g30457.1.p	Bradi3g30457	Trihelix	Brasy3G188700
Bradi3g30457.2.p	Bradi3g30457	Trihelix	Brasy3G188700
Bradi3g30457.3.p	Bradi3g30457	Trihelix	Brasy3G188700
Bradi3g30457.4.p	Bradi3g30457	Trihelix	Brasy3G188700
Bradi3g31890.1.p	Bradi3g31890	bZIP	Brasy4G283600
Bradi3g32890.1.p	Bradi3g32890	GRAS	Brasy3G209100
Bradi3g33170.2.p	Bradi3g33170	bHLH	Brasy3G212000
Bradi3g33170.3.p	Bradi3g33170	bHLH	Brasy3G212000
Bradi3g33170.4.p	Bradi3g33170	bHLH	Brasy3G212000
Bradi3g33170.5.p	Bradi3g33170	bHLH	Brasy3G212000
Bradi3g33200.1.p	Bradi3g33200	GATA	Brasy3G212300
Bradi3g33320.3.p	Bradi3g33320	NAC	Brasy3G213300
Bradi3g33630.1.p	Bradi3g33630	Trihelix	Brasy2G471800
Bradi3g33680.2.p	Bradi3g33680	NAC	Brasy2G471400
Bradi3g33745.1.p	Bradi3g33745	FAR1	Brasy7G108700
Bradi3g33820.1.p	Bradi3g33820	STAT	Brasy2G469200
Bradi3g33820.2.p	Bradi3g33820	STAT	Brasy2G469200
Bradi3g33957.2.p	Bradi3g33957	NAC	Brasy5G213200
Bradi3g34200.1.p	Bradi3g34200	bHLH	Brasy3G219100
Bradi3g34567.2.p	Bradi3g34567	WRKY	Brasy3G224200
Bradi3g34567.3.p	Bradi3g34567	WRKY	Brasy3G224200
Bradi3g34567.4.p	Bradi3g34567	WRKY	Brasy3G224200
Bradi3g34670.10.p	Bradi3g34670	CPP	Brasy3G226200
Bradi3g34670.11.p	Bradi3g34670	CPP	Brasy3G226200
Bradi3g34670.12.p	Bradi3g34670	CPP	Brasy3G226200
Bradi3g34670.1.p	Bradi3g34670	CPP	Brasy3G226200
Bradi3g34670.2.p	Bradi3g34670	CPP	Brasy3G226200
Bradi3g34670.3.p	Bradi3g34670	CPP	Brasy3G226200
Bradi3g34670.4.p	Bradi3g34670	CPP	Brasy3G226200
Bradi3g34670.5.p	Bradi3g34670	CPP	Brasy3G226200
Bradi3g34670.6.p	Bradi3g34670	CPP	Brasy3G226200
Bradi3g34670.7.p	Bradi3g34670	CPP	Brasy3G226200
Bradi3g34670.8.p	Bradi3g34670	CPP	Brasy3G226200
Bradi3g34670.9.p	Bradi3g34670	CPP	Brasy3G226200
Bradi3g34850.1.p	Bradi3g34850	WRKY	Brasy3G228800
Bradi3g34930.1.p	Bradi3g34930	NF-YB	Brasy3G229700
Bradi3g35280.1.p	Bradi3g35280	LBD	Brasy1G501900
Bradi3g36590.2.p	Bradi3g36590	TCP	Brasy3G259000
Bradi3g36610.1.p	Bradi3g36610	bHLH	Brasy3G259300
Bradi3g36670.1.p	Bradi3g36670	NAC	Brasy3G259800
Bradi3g36670.2.p	Bradi3g36670	NAC	Brasy3G259800
Bradi3g36670.3.p	Bradi3g36670	NAC	Brasy3G259800
Bradi3g36670.4.p	Bradi3g36670	NAC	Brasy3G259800
Bradi3g37040.1.p	Bradi3g37040	ZF-HD	Brasy3G263500
Bradi3g37043.1.p	Bradi3g37043	ZF-HD	Brasy3G263600
Bradi3g37067.1.p	Bradi3g37067	NAC	Brasy3G263900
Bradi3g37930.2.p	Bradi3g37930	GeBP	Brasy3G279700
Bradi3g38179.2.p	Bradi3g38179	FAR1	Brasy4G352800
Bradi3g38200.1.p	Bradi3g38200	bZIP	Brasy3G282900
Bradi3g38200.3.p	Bradi3g38200	bZIP	Brasy3G282900
Bradi3g38250.1.p	Bradi3g38250	bHLH	Brasy3G283500
Bradi3g38360.1.p	Bradi3g38360	bHLH	Brasy3G284100
Bradi3g38430.1.p	Bradi3g38430	ZF-HD	Brasy3G285200
Bradi3g38510.1.p	Bradi3g38510	bHLH	Brasy3G286400
Bradi3g38682.2.p	Bradi3g38682	Trihelix	Brasy3G288600
Bradi3g38840.1.p	Bradi3g38840	bZIP	Brasy3G290200
Bradi3g38890.1.p	Bradi3g38890	bHLH	Brasy3G290700
Bradi3g38970.1.p	Bradi3g38970	bHLH	Brasy3G291600
Bradi3g38970.3.p	Bradi3g38970	bHLH	Brasy3G291600
Bradi3g38970.4.p	Bradi3g38970	bHLH	Brasy3G291600
Bradi3g38970.5.p	Bradi3g38970	bHLH	Brasy3G291600
Bradi3g38980.1.p	Bradi3g38980	Dof	Brasy3G291700
Bradi3g39280.1.p	Bradi3g39280	NF-YC	Brasy3G296200
Bradi3g39340.2.p	Bradi3g39340	WRKY	Brasy3G296800
Bradi3g39927.1.p	Bradi3g39927	bHLH	Brasy3G304500
Bradi3g39970.2.p	Bradi3g39970	EIL	Brasy3G304100
Bradi3g39970.3.p	Bradi3g39970	EIL	Brasy3G304100
Bradi3g39970.4.p	Bradi3g39970	EIL	Brasy3G304100
Bradi3g39970.5.p	Bradi3g39970	EIL	Brasy3G304100
Bradi3g40030.2.p	Bradi3g40030	SBP	Brasy3G305600
Bradi3g40030.3.p	Bradi3g40030	SBP	Brasy3G305600
Bradi3g40030.4.p	Bradi3g40030	SBP	Brasy3G305600
Bradi3g40030.5.p	Bradi3g40030	SBP	Brasy3G305600
Bradi3g40085.1.p	Bradi3g40085	NAC	Brasy3G306300
Bradi3g40240.1.p	Bradi3g40240	SBP	Brasy3G307900
Bradi3g40651.1.p	Bradi3g40651	LBD	Brasy3G314200
Bradi3g40860.1.p	Bradi3g40860	bHLH	Brasy3G321200
Bradi3g40860.2.p	Bradi3g40860	bHLH	Brasy3G321200
Bradi3g41250.1.p	Bradi3g41250	SBP	Brasy3G317000
Bradi3g41470.1.p	Bradi3g41470	NAC	Brasy3G325200
Bradi3g41510.1.p	Bradi3g41510	bHLH	Brasy3G325900
Bradi3g41510.2.p	Bradi3g41510	bHLH	Brasy3G325900
Bradi3g41817.3.p	Bradi3g41817	bZIP	Brasy9G154800
Bradi3g41950.1.p	Bradi3g41950	bHLH	Brasy4G275700
Bradi3g41980.1.p	Bradi3g41980	bZIP	Brasy4G275900
Bradi3g42130.1.p	Bradi3g42130	HSF	Brasy3G332100
Bradi3g42197.1.p	Bradi3g42197	SRS	Brasy3G333000
Bradi3g43250.3.p	Bradi3g43250	bHLH	Brasy4G235000
Bradi3g43710.1.p	Bradi3g43710	HSF	Brasy9G159200
Bradi3g44370.1.p	Bradi3g44370	Trihelix	Brasy4G213900
Bradi3g44370.3.p	Bradi3g44370	Trihelix	Brasy4G213900
Bradi3g44370.5.p	Bradi3g44370	Trihelix	Brasy4G213900
Bradi3g44370.6.p	Bradi3g44370	Trihelix	Brasy4G213900
Bradi3g44370.7.p	Bradi3g44370	Trihelix	Brasy4G213900
Bradi3g45130.1.p	Bradi3g45130	E2F/DP	Brasy4G204800
Bradi3g45130.2.p	Bradi3g45130	E2F/DP	Brasy4G204800
Bradi3g45130.3.p	Bradi3g45130	E2F/DP	Brasy4G204800
Bradi3g45130.4.p	Bradi3g45130	E2F/DP	Brasy4G204800
Bradi3g45130.5.p	Bradi3g45130	E2F/DP	Brasy4G204800
Bradi3g45130.6.p	Bradi3g45130	E2F/DP	Brasy4G204800
Bradi3g45130.7.p	Bradi3g45130	E2F/DP	Brasy4G204800
Bradi3g45130.8.p	Bradi3g45130	E2F/DP	Brasy4G204800
Bradi3g45170.4.p	Bradi3g45170	bZIP	Brasy4G204400
Bradi3g45230.1.p	Bradi3g45230	Trihelix	Brasy4G203400
Bradi3g45300.1.p	Bradi3g45300	Trihelix	Brasy4G202400
Bradi3g45360.2.p	Bradi3g45360	bHLH	Brasy4G201600
Bradi3g45360.3.p	Bradi3g45360	bHLH	Brasy4G201600
Bradi3g45360.4.p	Bradi3g45360	bHLH	Brasy4G201600
Bradi3g45365.1.p	Bradi3g45365	bHLH	Brasy4G201400
Bradi3g45470.1.p	Bradi3g45470	FAR1	Brasy4G200100
Bradi3g46200.1.p	Bradi3g46200	bHLH	Brasy4G180500
Bradi3g46200.2.p	Bradi3g46200	bHLH	Brasy4G180500
Bradi3g46210.1.p	Bradi3g46210	Trihelix	Brasy4G180400
Bradi3g46680.1.p	Bradi3g46680	EIL	Brasy4G173600
Bradi3g46690.1.p	Bradi3g46690	EIL	Brasy4G173500
Bradi3g46900.1.p	Bradi3g46900	NAC	Brasy4G171000
Bradi3g46900.2.p	Bradi3g46900	NAC	Brasy4G171000
Bradi3g46900.3.p	Bradi3g46900	NAC	Brasy4G171000
Bradi3g46900.4.p	Bradi3g46900	NAC	Brasy4G171000
Bradi3g47627.1.p	Bradi3g47627	NAC	Brasy4G161700
Bradi3g48070.3.p	Bradi3g48070	bHLH	Brasy4G156200
Bradi3g48070.4.p	Bradi3g48070	bHLH	Brasy4G156200
Bradi3g48310.1.p	Bradi3g48310	FAR1	Brasy4G152700
Bradi3g48330.2.p	Bradi3g48330	FAR1	Brasy4G152500
Bradi3g49660.1.p	Bradi3g49660	TCP	Brasy4G309500
Bradi3g50050.1.p	Bradi3g50050	YABBY	Brasy4G313500
Bradi3g50067.1.p	Bradi3g50067	NAC	Brasy4G313700
Bradi3g50160.2.p	Bradi3g50160	GATA	Brasy4G314800
Bradi3g50360.1.p	Bradi3g50360	WRKY	Brasy4G191900
Bradi3g50930.3.p	Bradi3g50930	GRAS	Brasy4G123000
Bradi3g51510.1.p	Bradi3g51510	Dof	Brasy4G113200
Bradi3g51510.3.p	Bradi3g51510	Dof	Brasy4G113200
Bradi3g51510.4.p	Bradi3g51510	Dof	Brasy4G113200
Bradi3g52150.1.p	Bradi3g52150	bHLH	Brasy2G374200
Bradi3g52420.1.p	Bradi3g52420	WRKY	Brasy2G377500
Bradi3g52420.2.p	Bradi3g52420	WRKY	Brasy2G377500
Bradi3g52790.1.p	Bradi3g52790	bHLH	Brasy1G265500
Bradi3g52790.2.p	Bradi3g52790	bHLH	Brasy1G265500
Bradi3g52837.1.p	Bradi3g52837	ZF-HD	Brasy1G265900
Bradi3g52880.1.p	Bradi3g52880	Dof	Brasy4G102400
Bradi3g53060.2.p	Bradi3g53060	bHLH	Brasy4G100400
Bradi3g54070.1.p	Bradi3g54070	bHLH	Brasy4G087400
Bradi3g54640.1.p	Bradi3g54640	bHLH	Brasy4G074200
Bradi3g54640.2.p	Bradi3g54640	bHLH	Brasy4G074200
Bradi3g54640.3.p	Bradi3g54640	bHLH	Brasy4G074200
Bradi3g54720.1.p	Bradi3g54720	GATA	Brasy4G073000
Bradi3g54817.1.p	Bradi3g54817	NAC	Brasy4G071500
Bradi3g55680.1.p	Bradi3g55680	LBD	Brasy4G059000
Bradi3g56080.1.p	Bradi3g56080	NAC	Brasy4G054100
Bradi3g56290.1.p	Bradi3g56290	bZIP	Brasy4G050000
Bradi3g56340.1.p	Bradi3g56340	bHLH	Brasy4G049300
Bradi3g56340.2.p	Bradi3g56340	bHLH	Brasy4G049300
Bradi3g56380.1.p	Bradi3g56380	Dof	Brasy4G048800
Bradi3g56400.1.p	Bradi3g56400	NF-YB	Brasy4G048600
Bradi3g57320.1.p	Bradi3g57320	NF-YA	Brasy4G037000
Bradi3g57640.1.p	Bradi3g57640	GeBP	Brasy8G167000
Bradi3g57710.1.p	Bradi3g57710	WRKY	Brasy4G030700
Bradi3g57710.2.p	Bradi3g57710	WRKY	Brasy4G030700
Bradi3g57710.3.p	Bradi3g57710	WRKY	Brasy4G030700
Bradi3g57800.1.p	Bradi3g57800	GeBP	Brasy4G029600
Bradi3g57800.2.p	Bradi3g57800	GeBP	Brasy4G029600
Bradi3g57960.2.p	Bradi3g57960	bZIP	Brasy4G027400
Bradi3g57960.4.p	Bradi3g57960	bZIP	Brasy4G027400
Bradi3g57960.5.p	Bradi3g57960	bZIP	Brasy4G027400
Bradi3g58360.1.p	Bradi3g58360	bHLH	Brasy4G022600
Bradi3g59290.1.p	Bradi3g59290	bHLH	Brasy4G013500
Bradi3g59320.2.p	Bradi3g59320	TCP	Brasy4G013100
Bradi3g59380.1.p	Bradi3g59380	NAC	Brasy9G281800
Bradi3g59410.3.p	Bradi3g59410	Nin-like	Brasy9G282200
Bradi3g59410.4.p	Bradi3g59410	Nin-like	Brasy9G282200
Bradi3g59740.2.p	Bradi3g59740	E2F/DP	Brasy9G286900
Bradi3g59740.3.p	Bradi3g59740	E2F/DP	Brasy9G286900
Bradi3g59866.1.p	Bradi3g59866	NAC	Brasy9G288900
Bradi3g60352.1.p	Bradi3g60352	TCP	Brasy4G094700
Bradi3g60870.1.p	Bradi3g60870	bZIP	Brasy4G001500
Bradi4g00920.2.p	Bradi4g00920	bHLH	Brasy5G011500
Bradi4g00920.3.p	Bradi4g00920	bHLH	Brasy5G011500
Bradi4g00925.1.p	Bradi4g00925	FAR1	Brasy9G010400
Bradi4g01140.1.p	Bradi4g01140	GATA	Brasy5G015400
Bradi4g01140.2.p	Bradi4g01140	GATA	Brasy5G015400
Bradi4g01300.1.p	Bradi4g01300	YABBY	Brasy5G017300
Bradi4g01300.2.p	Bradi4g01300	YABBY	Brasy5G017300
Bradi4g01380.3.p	Bradi4g01380	NF-YA	Brasy5G018200
Bradi4g01820.10.p	Bradi4g01820	NF-YA	Brasy5G022900
Bradi4g01820.11.p	Bradi4g01820	NF-YA	Brasy5G022900
Bradi4g01820.12.p	Bradi4g01820	NF-YA	Brasy5G022900
Bradi4g01820.2.p	Bradi4g01820	NF-YA	Brasy5G022900
Bradi4g01820.5.p	Bradi4g01820	NF-YA	Brasy5G022900
Bradi4g01820.6.p	Bradi4g01820	NF-YA	Brasy5G022900
Bradi4g01820.7.p	Bradi4g01820	NF-YA	Brasy5G022900
Bradi4g01820.8.p	Bradi4g01820	NF-YA	Brasy5G022900
Bradi4g01820.9.p	Bradi4g01820	NF-YA	Brasy5G022900
Bradi4g01950.1.p	Bradi4g01950	WRKY	Brasy5G025700
Bradi4g02060.2.p	Bradi4g02060	NAC	Brasy5G027000
Bradi4g02390.1.p	Bradi4g02390	CPP	Brasy2G004500
Bradi4g02390.2.p	Bradi4g02390	CPP	Brasy2G004500
Bradi4g02390.3.p	Bradi4g02390	CPP	Brasy2G004500
Bradi4g02390.4.p	Bradi4g02390	CPP	Brasy2G004500
Bradi4g02390.5.p	Bradi4g02390	CPP	Brasy2G004500
Bradi4g02390.6.p	Bradi4g02390	CPP	Brasy2G004500
Bradi4g02410.1.p	Bradi4g02410	CPP	Brasy2G004700
Bradi4g02570.1.p	Bradi4g02570	bZIP	Brasy2G006700
Bradi4g02570.2.p	Bradi4g02570	bZIP	Brasy2G006700
Bradi4g02570.3.p	Bradi4g02570	bZIP	Brasy2G006700
Bradi4g02570.4.p	Bradi4g02570	bZIP	Brasy2G006700
Bradi4g02670.2.p	Bradi4g02670	bHLH	Brasy5G029500
Bradi4g02673.1.p	Bradi4g02673	bHLH	Brasy5G029600
Bradi4g02680.1.p	Bradi4g02680	WRKY	Brasy5G029800
Bradi4g02680.2.p	Bradi4g02680	WRKY	Brasy5G029800
Bradi4g03070.1.p	Bradi4g03070	bHLH	BrasyJ085600
Bradi4g03070.2.p	Bradi4g03070	bHLH	BrasyJ085600
Bradi4g03620.1.p	Bradi4g03620	NAC	Brasy5G044900
Bradi4g03867.1.p	Bradi4g03867	GRAS	BrasyJ106400
Bradi4g04260.2.p	Bradi4g04260	Dof	Brasy5G051500
Bradi4g06690.1.p	Bradi4g06690	WRKY	Brasy5G089300
Bradi4g07527.1.p	Bradi4g07527	NAC	Brasy5G097100
Bradi4g07607.1.p	Bradi4g07607	FAR1	Brasy7G012500
Bradi4g09138.1.p	Bradi4g09138	GRAS	Brasy1G243800
Bradi4g09142.1.p	Bradi4g09142	GRAS	Brasy1G244000
Bradi4g09144.1.p	Bradi4g09144	GRAS	Brasy1G244100
Bradi4g09146.1.p	Bradi4g09146	GRAS	Brasy1G244200
Bradi4g09148.1.p	Bradi4g09148	GRAS	Brasy1G244300
Bradi4g09155.1.p	Bradi4g09155	GRAS	Brasy1G244400
Bradi4g09156.1.p	Bradi4g09156	GRAS	Brasy1G244500
Bradi4g09157.1.p	Bradi4g09157	GRAS	Brasy1G244600
Bradi4g09160.3.p	Bradi4g09160	GRAS	Brasy1G244700
Bradi4g09170.1.p	Bradi4g09170	GRAS	Brasy1G244800
Bradi4g09175.1.p	Bradi4g09175	GRAS	Brasy1G244900
Bradi4g09190.1.p	Bradi4g09190	GRAS	Brasy1G245100
Bradi4g09196.1.p	Bradi4g09196	GRAS	Brasy1G245300
Bradi4g09232.1.p	Bradi4g09232	GRAS	Brasy1G245600
Bradi4g09238.1.p	Bradi4g09238	GRAS	Brasy1G246100
Bradi4g09239.1.p	Bradi4g09239	GRAS	Brasy1G246200
Bradi4g09886.1.p	Bradi4g09886	WRKY	Brasy5G210900
Bradi4g09886.2.p	Bradi4g09886	WRKY	Brasy5G210900
Bradi4g11116.2.p	Bradi4g11116	E2F/DP	Brasy5G189300
Bradi4g11118.1.p	Bradi4g11118	FAR1	Brasy3G169700
Bradi4g12615.1.p	Bradi4g12615	bHLH	Brasy7G036300
Bradi4g13409.1.p	Bradi4g13409	FAR1	Brasy1G397000
Bradi4g13586.1.p	Bradi4g13586	NAC	Brasy5G162600
Bradi4g14190.1.p	Bradi4g14190	bHLH	Brasy5G153200
Bradi4g14190.5.p	Bradi4g14190	bHLH	Brasy5G153200
Bradi4g15720.1.p	Bradi4g15720	GATA	Brasy5G134000
Bradi4g16243.1.p	Bradi4g16243	FAR1	Brasy4G053500
Bradi4g16740.1.p	Bradi4g16740	LBD	Brasy6G101900
Bradi4g16750.1.p	Bradi4g16750	LBD	Brasy6G101800
Bradi4g16840.1.p	Bradi4g16840	NF-YC	Brasy5G125800
Bradi4g17460.1.p	Bradi4g17460	bHLH	Brasy5G114200
Bradi4g17460.2.p	Bradi4g17460	bHLH	Brasy5G114200
Bradi4g18390.1.p	Bradi4g18390	GRAS	BrasyJ090300
Bradi4g18891.1.p	Bradi4g18891	SBP	Brasy5G260900
Bradi4g19060.1.p	Bradi4g19060	WRKY	Brasy5G289100
Bradi4g19060.2.p	Bradi4g19060	WRKY	Brasy5G289100
Bradi4g19577.2.p	Bradi4g19577	bHLH	Brasy5G288800
Bradi4g20720.1.p	Bradi4g20720	Nin-like	Brasy5G285300
Bradi4g20720.2.p	Bradi4g20720	Nin-like	Brasy5G285300
Bradi4g21160.1.p	Bradi4g21160	ZF-HD	Brasy5G281200
Bradi4g22130.3.p	Bradi4g22130	bZIP	Brasy5G269300
Bradi4g22130.4.p	Bradi4g22130	bZIP	Brasy5G269300
Bradi4g22681.1.p	Bradi4g22681	NAC	Brasy5G275100
Bradi4g23550.1.p	Bradi4g23550	GATA	Brasy5G258600
Bradi4g23625.1.p	Bradi4g23625	FAR1	Brasy7G139700
Bradi4g23640.1.p	Bradi4g23640	NAC	Brasy5G255900
Bradi4g24060.1.p	Bradi4g24060	NAC	Brasy2G131000
Bradi4g24100.1.p	Bradi4g24100	NAC	Brasy2G130900
Bradi4g24550.2.p	Bradi4g24550	TCP	Brasy2G133400
Bradi4g24750.1.p	Bradi4g24750	Trihelix	Brasy5G246200
Bradi4g24750.3.p	Bradi4g24750	Trihelix	Brasy5G246200
Bradi4g24750.4.p	Bradi4g24750	Trihelix	Brasy5G246200
Bradi4g24867.1.p	Bradi4g24867	GRAS	Brasy5G244900
Bradi4g25717.1.p	Bradi4g25717	WRKY	Brasy2G014900
Bradi4g25717.2.p	Bradi4g25717	WRKY	Brasy2G014900
Bradi4g25717.4.p	Bradi4g25717	WRKY	Brasy2G014900
Bradi4g26170.1.p	Bradi4g26170	ZF-HD	Brasy5G229000
Bradi4g26275.1.p	Bradi4g26275	NAC	Brasy5G227300
Bradi4g26520.2.p	Bradi4g26520	GRAS	Brasy5G224100
Bradi4g26520.3.p	Bradi4g26520	GRAS	Brasy5G224100
Bradi4g26520.4.p	Bradi4g26520	GRAS	Brasy5G224100
Bradi4g26520.5.p	Bradi4g26520	GRAS	Brasy5G224100
Bradi4g26520.6.p	Bradi4g26520	GRAS	Brasy5G224100
Bradi4g26520.7.p	Bradi4g26520	GRAS	Brasy5G224100
Bradi4g26520.8.p	Bradi4g26520	GRAS	Brasy5G224100
Bradi4g26670.1.p	Bradi4g26670	bZIP	Brasy5G221700
Bradi4g26670.4.p	Bradi4g26670	bZIP	Brasy5G221700
Bradi4g26670.5.p	Bradi4g26670	bZIP	Brasy5G221700
Bradi4g26670.6.p	Bradi4g26670	bZIP	Brasy5G221700
Bradi4g27100.1.p	Bradi4g27100	bZIP	Brasy5G295900
Bradi4g27100.2.p	Bradi4g27100	bZIP	Brasy5G295900
Bradi4g27100.3.p	Bradi4g27100	bZIP	Brasy5G295900
Bradi4g27720.1.p	Bradi4g27720	bZIP	Brasy5G298300
Bradi4g28280.1.p	Bradi4g28280	WRKY	Brasy5G307000
Bradi4g28800.2.p	Bradi4g28800	bHLH	Brasy5G314700
Bradi4g28883.1.p	Bradi4g28883	LBD	Brasy5G317000
Bradi4g29370.1.p	Bradi4g29370	bHLH	Brasy5G237200
Bradi4g29936.1.p	Bradi4g29936	FAR1	Brasy3G106800
Bradi4g29980.1.p	Bradi4g29980	TCP	Brasy5G326700
Bradi4g29990.1.p	Bradi4g29990	bHLH	Brasy5G326900
Bradi4g30177.1.p	Bradi4g30177	NAC	Brasy5G328900
Bradi4g30230.1.p	Bradi4g30230	ZF-HD	Brasy5G329500
Bradi4g30230.2.p	Bradi4g30230	ZF-HD	Brasy5G329500
Bradi4g30230.3.p	Bradi4g30230	ZF-HD	Brasy5G329500
Bradi4g30230.4.p	Bradi4g30230	ZF-HD	Brasy5G329500
Bradi4g30230.5.p	Bradi4g30230	ZF-HD	Brasy5G329500
Bradi4g30240.1.p	Bradi4g30240	ZF-HD	Brasy5G329700
Bradi4g30350.1.p	Bradi4g30350	bHLH	Brasy5G331200
Bradi4g30350.2.p	Bradi4g30350	bHLH	Brasy5G331200
Bradi4g30350.3.p	Bradi4g30350	bHLH	Brasy5G331200
Bradi4g30350.4.p	Bradi4g30350	bHLH	Brasy5G331200
Bradi4g30350.5.p	Bradi4g30350	bHLH	Brasy5G331200
Bradi4g30350.6.p	Bradi4g30350	bHLH	Brasy5G331200
Bradi4g30350.7.p	Bradi4g30350	bHLH	Brasy5G331200
Bradi4g30350.8.p	Bradi4g30350	bHLH	Brasy5G331200
Bradi4g30360.1.p	Bradi4g30360	WRKY	Brasy5G331300
Bradi4g30372.1.p	Bradi4g30372	WRKY	Brasy5G331400
Bradi4g31840.1.p	Bradi4g31840	GeBP	Brasy3G129000
Bradi4g32050.1.p	Bradi4g32050	HSF	Brasy3G126800
Bradi4g32060.1.p	Bradi4g32060	bHLH	Brasy5G342800
Bradi4g32090.1.p	Bradi4g32090	bZIP	Brasy5G343100
Bradi4g32130.1.p	Bradi4g32130	HSF	Brasy5G343700
Bradi4g32470.1.p	Bradi4g32470	bHLH	Brasy5G347800
Bradi4g32580.1.p	Bradi4g32580	ZF-HD	Brasy5G349000
Bradi4g32650.1.p	Bradi4g32650	bHLH	Brasy4G399000
Bradi4g32650.2.p	Bradi4g32650	bHLH	Brasy4G399000
Bradi4g32920.1.p	Bradi4g32920	bZIP	Brasy5G352700
Bradi4g32934.1.p	Bradi4g32934	bHLH	Brasy5G352900
Bradi4g32967.2.p	Bradi4g32967	bHLH	Brasy5G353400
Bradi4g33000.1.p	Bradi4g33000	Dof	Brasy5G353800
Bradi4g33290.1.p	Bradi4g33290	NF-YC	Brasy5G357300
Bradi4g33370.1.p	Bradi4g33370	WRKY	Brasy5G358600
Bradi4g33370.2.p	Bradi4g33370	WRKY	Brasy5G358600
Bradi4g33670.1.p	Bradi4g33670	bHLH	Brasy5G362000
Bradi4g33740.1.p	Bradi4g33740	bZIP	Brasy5G362600
Bradi4g33740.2.p	Bradi4g33740	bZIP	Brasy5G362600
Bradi4g33740.3.p	Bradi4g33740	bZIP	Brasy5G362600
Bradi4g33740.4.p	Bradi4g33740	bZIP	Brasy5G362600
Bradi4g33740.5.p	Bradi4g33740	bZIP	Brasy5G362600
Bradi4g33750.1.p	Bradi4g33750	EIL	Brasy5G362700
Bradi4g33770.1.p	Bradi4g33770	SBP	Brasy5G362800
Bradi4g33770.2.p	Bradi4g33770	SBP	Brasy5G362800
Bradi4g34022.1.p	Bradi4g34022	NAC	Brasy5G366900
Bradi4g34022.2.p	Bradi4g34022	NAC	Brasy5G366900
Bradi4g34157.1.p	Bradi4g34157	NAC	Brasy5G368600
Bradi4g34157.2.p	Bradi4g34157	NAC	Brasy5G368600
Bradi4g34350.1.p	Bradi4g34350	bHLH	Brasy5G370600
Bradi4g34667.1.p	Bradi4g34667	SBP	Brasy5G376400
Bradi4g34800.1.p	Bradi4g34800	NAC	Brasy5G377900
Bradi4g34870.1.p	Bradi4g34870	bHLH	Brasy5G378700
Bradi4g34870.3.p	Bradi4g34870	bHLH	Brasy5G378700
Bradi4g34870.4.p	Bradi4g34870	bHLH	Brasy5G378700
Bradi4g34870.5.p	Bradi4g34870	bHLH	Brasy5G378700
Bradi4g34870.6.p	Bradi4g34870	bHLH	Brasy5G378700
Bradi4g34870.7.p	Bradi4g34870	bHLH	Brasy5G378700
Bradi4g35240.1.p	Bradi4g35240	bZIP	Brasy5G383000
Bradi4g35240.2.p	Bradi4g35240	bZIP	Brasy5G383000
Bradi4g35370.1.p	Bradi4g35370	bZIP	Brasy5G385200
Bradi4g35400.1.p	Bradi4g35400	bHLH	Brasy5G385700
Bradi4g35670.1.p	Bradi4g35670	TCP	Brasy5G389700
Bradi4g35780.3.p	Bradi4g35780	HSF	Brasy5G391100
Bradi4g36030.1.p	Bradi4g36030	SRS	Brasy5G394100
Bradi4g36233.2.p	Bradi4g36233	FAR1	Brasy8G157200
Bradi4g37147.1.p	Bradi4g37147	Nin-like	Brasy5G417300
Bradi4g37147.2.p	Bradi4g37147	Nin-like	Brasy5G417300
Bradi4g37318.1.p	Bradi4g37318	NAC	Brasy5G419900
Bradi4g37327.1.p	Bradi4g37327	NAC	Brasy5G420000
Bradi4g37327.2.p	Bradi4g37327	NAC	Brasy5G420000
Bradi4g37730.1.p	Bradi4g37730	Trihelix	Brasy2G477300
Bradi4g38527.1.p	Bradi4g38527	NF-YB	Brasy5G425800
Bradi4g38630.1.p	Bradi4g38630	BES1	Brasy5G427300
Bradi4g39630.1.p	Bradi4g39630	bZIP	Brasy5G438800
Bradi4g39766.1.p	Bradi4g39766	Nin-like	Brasy5G440100
Bradi4g40020.1.p	Bradi4g40020	FAR1	Brasy8G208600
Bradi4g40270.2.p	Bradi4g40270	ZF-HD	Brasy8G204800
Bradi4g40880.1.p	Bradi4g40880	NAC	Brasy5G446100
Bradi4g40880.2.p	Bradi4g40880	NAC	Brasy5G446100
Bradi4g41200.1.p	Bradi4g41200	NAC	Brasy5G449400
Bradi4g41430.1.p	Bradi4g41430	TCP	Brasy5G451900
Bradi4g41570.1.p	Bradi4g41570	GATA	Brasy5G453900
Bradi4g41830.5.p	Bradi4g41830	Trihelix	Brasy5G457800
Bradi4g41880.2.p	Bradi4g41880	GRAS	Brasy5G458500
Bradi4g41890.1.p	Bradi4g41890	bZIP	Brasy5G458700
Bradi4g41960.1.p	Bradi4g41960	FAR1	Brasy5G461600
Bradi4g42050.1.p	Bradi4g42050	E2F/DP	Brasy5G463000
Bradi4g42050.2.p	Bradi4g42050	E2F/DP	Brasy5G463000
Bradi4g42050.3.p	Bradi4g42050	E2F/DP	Brasy5G463000
Bradi4g42050.4.p	Bradi4g42050	E2F/DP	Brasy5G463000
Bradi4g42120.1.p	Bradi4g42120	bZIP	Brasy5G463900
Bradi4g42180.1.p	Bradi4g42180	NAC	Brasy5G465000
Bradi4g43010.1.p	Bradi4g43010	NAC	Brasy1G045900
Bradi4g43200.2.p	Bradi4g43200	GRAS	Brasy1G043800
Bradi4g43220.1.p	Bradi4g43220	FAR1	Brasy1G044000
Bradi4g43322.1.p	Bradi4g43322	bZIP	Brasy1G045600
Bradi4g43346.1.p	Bradi4g43346	NAC	Brasy1G045900
Bradi4g43680.1.p	Bradi4g43680	GRAS	Brasy5G484800
Bradi4g43680.3.p	Bradi4g43680	GRAS	Brasy5G484800
Bradi4g43850.3.p	Bradi4g43850	bZIP	Brasy5G486900
Bradi4g43850.4.p	Bradi4g43850	bZIP	Brasy5G486900
Bradi4g43850.5.p	Bradi4g43850	bZIP	Brasy5G486900
Bradi4g43960.1.p	Bradi4g43960	ZF-HD	Brasy5G494000
Bradi4g43995.1.p	Bradi4g43995	NAC	Brasy5G494700
Bradi4g44000.1.p	Bradi4g44000	NAC	Brasy5G496800
Bradi4g44093.1.p	Bradi4g44093	GRAS	Brasy5G497700
Bradi4g44342.1.p	Bradi4g44342	WRKY	Brasy5G501100
Bradi4g44350.1.p	Bradi4g44350	WRKY	Brasy5G501200
Bradi4g44360.1.p	Bradi4g44360	WRKY	Brasy5G501300
Bradi4g44370.2.p	Bradi4g44370	WRKY	Brasy5G501400
Bradi4g44850.1.p	Bradi4g44850	LBD	Brasy5G510600
Bradi4g45224.2.p	Bradi4g45224	Dof	Brasy5G520800
Bradi5g01250.1.p	Bradi5g01250	GeBP	Brasy9G005100
Bradi5g01250.3.p	Bradi5g01250	GeBP	Brasy9G005100
Bradi5g01257.1.p	Bradi5g01257	GeBP	Brasy9G156800
Bradi5g01257.2.p	Bradi5g01257	GeBP	Brasy9G156800
Bradi5g01257.3.p	Bradi5g01257	GeBP	Brasy9G156800
Bradi5g01900.1.p	Bradi5g01900	bHLH	Brasy9G036800
Bradi5g01920.2.p	Bradi5g01920	E2F/DP	Brasy9G037000
Bradi5g01920.3.p	Bradi5g01920	E2F/DP	Brasy9G037000
Bradi5g02880.1.p	Bradi5g02880	TCP	Brasy9G077100
Bradi5g03565.1.p	Bradi5g03565	FAR1	Brasy3G169700
Bradi5g04817.1.p	Bradi5g04817	WRKY	BrasyJ049100
Bradi5g05110.1.p	Bradi5g05110	bHLH	Brasy9G092900
Bradi5g05110.2.p	Bradi5g05110	bHLH	Brasy9G092900
Bradi5g06620.1.p	Bradi5g06620	bHLH	Brasy6G230700
Bradi5g07720.1.p	Bradi5g07720	bHLH	Brasy9G101900
Bradi5g08167.1.p	Bradi5g08167	CAMTA	Brasy9G107000
Bradi5g08167.3.p	Bradi5g08167	CAMTA	Brasy9G107000
Bradi5g08600.1.p	Bradi5g08600	Trihelix	Brasy9G112100
Bradi5g08600.2.p	Bradi5g08600	Trihelix	Brasy9G112100
Bradi5g08600.3.p	Bradi5g08600	Trihelix	Brasy9G112100
Bradi5g08980.1.p	Bradi5g08980	Trihelix	Brasy8G005100
Bradi5g08980.2.p	Bradi5g08980	Trihelix	Brasy8G005100
Bradi5g09140.1.p	Bradi5g09140	S1Fa-like	Brasy4G256700
Bradi5g09140.2.p	Bradi5g09140	S1Fa-like	Brasy4G256700
Bradi5g09140.3.p	Bradi5g09140	S1Fa-like	Brasy4G256700
Bradi5g09640.2.p	Bradi5g09640	E2F/DP	Brasy9G122700
Bradi5g09640.3.p	Bradi5g09640	E2F/DP	Brasy9G122700
Bradi5g09640.4.p	Bradi5g09640	E2F/DP	Brasy9G122700
Bradi5g09640.5.p	Bradi5g09640	E2F/DP	Brasy9G122700
Bradi5g09640.6.p	Bradi5g09640	E2F/DP	Brasy9G122700
Bradi5g09640.7.p	Bradi5g09640	E2F/DP	Brasy9G122700
Bradi5g10320.1.p	Bradi5g10320	GRAS	Brasy9G135300
Bradi5g10470.1.p	Bradi5g10470	ZF-HD	Brasy9G137900
Bradi5g10640.1.p	Bradi5g10640	NAC	Brasy9G140100
Bradi5g11070.1.p	Bradi5g11070	Trihelix	Brasy9G150900
Bradi5g11247.1.p	Bradi5g11247	NAC	Brasy9G147900
Bradi5g11330.3.p	Bradi5g11330	FAR1	Brasy9G146600
Bradi5g11330.4.p	Bradi5g11330	FAR1	Brasy9G146600
Bradi5g11330.5.p	Bradi5g11330	FAR1	Brasy9G146600
Bradi5g11330.6.p	Bradi5g11330	FAR1	Brasy9G146600
Bradi5g11330.7.p	Bradi5g11330	FAR1	Brasy9G146600
Bradi5g11330.8.p	Bradi5g11330	FAR1	Brasy9G146600
Bradi5g11516.1.p	Bradi5g11516	FAR1	Brasy1G332100
Bradi5g12127.1.p	Bradi5g12127	EIL	Brasy9G162600
Bradi5g12338.1.p	Bradi5g12338	GRAS	Brasy9G165900
Bradi5g12407.4.p	Bradi5g12407	NAC	Brasy9G167100
Bradi5g12407.5.p	Bradi5g12407	NAC	Brasy9G167100
Bradi5g13090.1.p	Bradi5g13090	WRKY	Brasy9G174900
Bradi5g13090.2.p	Bradi5g13090	WRKY	Brasy9G174900
Bradi5g13370.1.p	Bradi5g13370	FAR1	Brasy9G180500
Bradi5g13450.1.p	Bradi5g13450	NAC	Brasy9G181500
Bradi5g13816.1.p	Bradi5g13816	NAC	Brasy9G188600
Bradi5g13900.1.p	Bradi5g13900	Trihelix	Brasy9G189700
Bradi5g14497.1.p	Bradi5g14497	bZIP	Brasy9G196400
Bradi5g14497.2.p	Bradi5g14497	bZIP	Brasy9G196400
Bradi5g14736.1.p	Bradi5g14736	NAC	Brasy9G200100
Bradi5g15230.1.p	Bradi5g15230	NAC	Brasy9G206100
Bradi5g15587.1.p	Bradi5g15587	NAC	Brasy9G214400
Bradi5g16270.1.p	Bradi5g16270	TCP	Brasy9G221000
Bradi5g16910.1.p	Bradi5g16910	YABBY	Brasy9G228800
Bradi5g17057.1.p	Bradi5g17057	GATA	Brasy9G230500
Bradi5g17150.1.p	Bradi5g17150	Trihelix	Brasy9G231200
Bradi5g17150.2.p	Bradi5g17150	Trihelix	Brasy9G231200
Bradi5g17150.3.p	Bradi5g17150	Trihelix	Brasy9G231200
Bradi5g17150.4.p	Bradi5g17150	Trihelix	Brasy9G231200
Bradi5g17150.5.p	Bradi5g17150	Trihelix	Brasy9G231200
Bradi5g17150.6.p	Bradi5g17150	Trihelix	Brasy9G231200
Bradi5g17150.7.p	Bradi5g17150	Trihelix	Brasy9G231200
Bradi5g17281.1.p	Bradi5g17281	Trihelix	Brasy9G233200
Bradi5g17370.1.p	Bradi5g17370	GATA	Brasy9G234500
Bradi5g17370.3.p	Bradi5g17370	GATA	Brasy9G234500
Bradi5g17395.2.p	Bradi5g17395	WRKY	Brasy9G234700
Bradi5g17395.3.p	Bradi5g17395	WRKY	Brasy9G234700
Bradi5g17722.1.p	Bradi5g17722	SBP	Brasy1G070300
Bradi5g17722.2.p	Bradi5g17722	SBP	Brasy1G070300
Bradi5g17722.3.p	Bradi5g17722	SBP	Brasy1G070300
Bradi5g18044.2.p	Bradi5g18044	NAC	Brasy9G245500
Bradi5g18430.1.p	Bradi5g18430	Nin-like	Brasy9G250100
Bradi5g18640.1.p	Bradi5g18640	Dof	Brasy9G252100
Bradi5g18680.1.p	Bradi5g18680	HSF	Brasy9G253700
Bradi5g19190.1.p	Bradi5g19190	GRAS	Brasy9G259700
Bradi5g19950.1.p	Bradi5g19950	bHLH	Brasy9G280200
Bradi5g20290.2.p	Bradi5g20290	WRKY	Brasy9G302700
Bradi5g20340.1.p	Bradi5g20340	LFY	Brasy9G303500
Bradi5g20397.2.p	Bradi5g20397	bHLH	Brasy9G304100
Bradi5g20397.3.p	Bradi5g20397	bHLH	Brasy9G304100
Bradi5g20700.1.p	Bradi5g20700	WRKY	Brasy9G306900
Bradi5g20847.1.p	Bradi5g20847	Trihelix	Brasy9G308900
Bradi5g21010.1.p	Bradi5g21010	NAC	Brasy9G310900
Bradi5g21820.1.p	Bradi5g21820	FAR1	Brasy1G439200
Bradi5g21820.2.p	Bradi5g21820	FAR1	Brasy1G439200
Bradi5g21820.3.p	Bradi5g21820	FAR1	Brasy1G439200
Bradi5g21950.1.p	Bradi5g21950	bHLH	Brasy1G441100
Bradi5g21983.1.p	Bradi5g21983	NAC	Brasy4G145200
Bradi5g22920.1.p	Bradi5g22920	bHLH	Brasy9G317800
Bradi5g23300.1.p	Bradi5g23300	Nin-like	Brasy9G325300
Bradi5g23300.2.p	Bradi5g23300	Nin-like	Brasy9G325300
Bradi5g23340.1.p	Bradi5g23340	bZIP	Brasy9G325800
Bradi5g23340.2.p	Bradi5g23340	bZIP	Brasy9G325800
Bradi5g23580.1.p	Bradi5g23580	bHLH	Brasy9G329300
Bradi5g23656.1.p	Bradi5g23656	GATA	Brasy9G330600
Bradi5g24670.1.p	Bradi5g24670	SBP	Brasy9G068200
Bradi5g25700.1.p	Bradi5g25700	Trihelix	Brasy4G230200
Bradi5g25700.2.p	Bradi5g25700	Trihelix	Brasy4G230200
Bradi5g26240.1.p	Bradi5g26240	Dof	Brasy9G349800
Bradi5g26800.1.p	Bradi5g26800	NF-YC	Brasy9G357800
Bradi5g27467.2.p	Bradi5g27467	NAC	Brasy9G365400
Bradi5g27467.3.p	Bradi5g27467	NAC	Brasy9G365400
Bradi5g27467.4.p	Bradi5g27467	NAC	Brasy9G365400
Bradi5g27467.5.p	Bradi5g27467	NAC	Brasy9G365400
Bradi5g27467.7.p	Bradi5g27467	NAC	Brasy9G365400
Bradi1g12477.1.p	Bradi1g12477	ARF	Brasy2G285900
Bradi1g32547.1.p	Bradi1g32547	ARF	Brasy7G195000
Bradi1g33160.1.p	Bradi1g33160	ARF	Brasy7G187700
Bradi1g34340.1.p	Bradi1g34340	ARF	Brasy9G043900
Bradi1g46602.10.p	Bradi1g46602	ARF	Brasy1G401600
Bradi1g46602.11.p	Bradi1g46602	ARF	Brasy1G401600
Bradi1g46602.12.p	Bradi1g46602	ARF	Brasy1G401600
Bradi1g46602.13.p	Bradi1g46602	ARF	Brasy1G401600
Bradi1g46602.14.p	Bradi1g46602	ARF	Brasy1G401600
Bradi1g46602.2.p	Bradi1g46602	ARF	Brasy1G401600
Bradi1g46602.6.p	Bradi1g46602	ARF	Brasy1G401600
Bradi1g46602.7.p	Bradi1g46602	ARF	Brasy1G401600
Bradi1g46602.8.p	Bradi1g46602	ARF	Brasy1G401600
Bradi1g46602.9.p	Bradi1g46602	ARF	Brasy1G401600
Bradi2g08120.1.p	Bradi2g08120	ARF	Brasy1G434300
Bradi2g08120.2.p	Bradi2g08120	ARF	Brasy1G434300
Bradi2g08120.3.p	Bradi2g08120	ARF	Brasy1G434300
Bradi2g08120.4.p	Bradi2g08120	ARF	Brasy1G434300
Bradi2g16610.10.p	Bradi2g16610	ARF	Brasy8G035100
Bradi2g16610.1.p	Bradi2g16610	ARF	Brasy8G035100
Bradi2g16610.2.p	Bradi2g16610	ARF	Brasy8G035100
Bradi2g16610.4.p	Bradi2g16610	ARF	Brasy8G035100
Bradi2g16610.5.p	Bradi2g16610	ARF	Brasy8G035100
Bradi2g16610.6.p	Bradi2g16610	ARF	Brasy8G035100
Bradi2g16610.8.p	Bradi2g16610	ARF	Brasy8G035100
Bradi2g16610.9.p	Bradi2g16610	ARF	Brasy8G035100
Bradi2g19867.1.p	Bradi2g19867	ARF	Brasy8G068200
Bradi2g19867.2.p	Bradi2g19867	ARF	Brasy8G068200
Bradi2g19867.3.p	Bradi2g19867	ARF	Brasy8G068200
Bradi2g46190.1.p	Bradi2g46190	ARF	Brasy1G261200
Bradi2g50120.2.p	Bradi2g50120	ARF	Brasy1G197300
Bradi2g50120.3.p	Bradi2g50120	ARF	Brasy1G197300
Bradi2g59480.1.p	Bradi2g59480	ARF	Brasy1G059900
Bradi3g04920.1.p	Bradi3g04920	ARF	Brasy4G368600
Bradi3g04920.2.p	Bradi3g04920	ARF	Brasy4G368600
Bradi3g28950.1.p	Bradi3g28950	ARF	Brasy3G176300
Bradi3g40437.2.p	Bradi3g40437	ARF	Brasy3G311300
Bradi3g40437.3.p	Bradi3g40437	ARF	Brasy3G311300
Bradi3g45880.2.p	Bradi3g45880	ARF	Brasy4G187900
Bradi3g45880.3.p	Bradi3g45880	ARF	Brasy4G187900
Bradi3g49320.1.p	Bradi3g49320	ARF	Brasy4G128800
Bradi4g01730.1.p	Bradi4g01730	ARF	Brasy5G021800
Bradi4g07470.1.p	Bradi4g07470	ARF	Brasy5G096300
Bradi4g07470.2.p	Bradi4g07470	ARF	Brasy5G096300
Bradi4g17410.1.p	Bradi4g17410	ARF	Brasy5G118500
Bradi4g17410.3.p	Bradi4g17410	ARF	Brasy5G118500
Bradi4g17410.4.p	Bradi4g17410	ARF	Brasy5G118500
Bradi4g17410.5.p	Bradi4g17410	ARF	Brasy5G118500
Bradi5g10950.1.p	Bradi5g10950	ARF	Brasy9G145600
Bradi5g15904.1.p	Bradi5g15904	ARF	Brasy9G217000
Bradi5g25157.1.p	Bradi5g25157	ARF	Brasy9G267000
Bradi5g25157.2.p	Bradi5g25157	ARF	Brasy9G267000
Bradi5g25767.1.p	Bradi5g25767	ARF	Brasy4G229400
Bradi5g27400.1.p	Bradi5g27400	ARF	Brasy9G364800
Bradi5g27400.2.p	Bradi5g27400	ARF	Brasy9G364800
Bradi1g14495.1.p	Bradi1g14495	B3	Brasy3G256700
Bradi1g14500.3.p	Bradi1g14500	B3	Brasy3G256800
Bradi1g14510.3.p	Bradi1g14510	B3	Brasy3G256900
Bradi1g14530.1.p	Bradi1g14530	B3	Brasy2G259700
Bradi1g14550.1.p	Bradi1g14550	B3	Brasy2G259100
Bradi1g14560.10.p	Bradi1g14560	B3	Brasy2G258500
Bradi1g14560.11.p	Bradi1g14560	B3	Brasy2G258500
Bradi1g14560.12.p	Bradi1g14560	B3	Brasy2G258500
Bradi1g14560.13.p	Bradi1g14560	B3	Brasy2G258500
Bradi1g14560.14.p	Bradi1g14560	B3	Brasy2G258500
Bradi1g14560.15.p	Bradi1g14560	B3	Brasy2G258500
Bradi1g14560.16.p	Bradi1g14560	B3	Brasy2G258500
Bradi1g14560.17.p	Bradi1g14560	B3	Brasy2G258500
Bradi1g14560.18.p	Bradi1g14560	B3	Brasy2G258500
Bradi1g14560.19.p	Bradi1g14560	B3	Brasy2G258500
Bradi1g14560.5.p	Bradi1g14560	B3	Brasy2G258500
Bradi1g14560.9.p	Bradi1g14560	B3	Brasy2G258500
Bradi1g17680.1.p	Bradi1g17680	B3	Brasy6G013800
Bradi1g17680.2.p	Bradi1g17680	B3	Brasy6G013800
Bradi1g24720.1.p	Bradi1g24720	B3	Brasy6G101200
Bradi1g24720.2.p	Bradi1g24720	B3	Brasy6G101200
Bradi1g24720.3.p	Bradi1g24720	B3	Brasy6G101200
Bradi1g24720.4.p	Bradi1g24720	B3	Brasy6G101200
Bradi1g35588.1.p	Bradi1g35588	B3	Brasy7G169700
Bradi1g35588.2.p	Bradi1g35588	B3	Brasy7G169700
Bradi1g45517.1.p	Bradi1g45517	B3	Brasy7G081000
Bradi1g45517.2.p	Bradi1g45517	B3	Brasy7G081000
Bradi1g45517.3.p	Bradi1g45517	B3	Brasy7G081000
Bradi1g48690.1.p	Bradi1g48690	B3	Brasy7G040700
Bradi1g50256.1.p	Bradi1g50256	B3	Brasy9G015700
Bradi1g51730.1.p	Bradi1g51730	B3	Brasy7G009700
Bradi1g52000.1.p	Bradi1g52000	B3	Brasy7G006200
Bradi1g60531.4.p	Bradi1g60531	B3	Brasy2G225000
Bradi1g70067.1.p	Bradi1g70067	B3	Brasy2G101500
Bradi1g72330.1.p	Bradi1g72330	B3	Brasy2G080400
Bradi1g77150.1.p	Bradi1g77150	B3	Brasy2G035500
Bradi2g07980.1.p	Bradi2g07980	B3	Brasy1G436300
Bradi2g07980.2.p	Bradi2g07980	B3	Brasy1G436300
Bradi2g22130.3.p	Bradi2g22130	B3	Brasy8G106300
Bradi2g22130.4.p	Bradi2g22130	B3	Brasy8G106300
Bradi2g37387.1.p	Bradi2g37387	B3	Brasy8G259500
Bradi2g37387.3.p	Bradi2g37387	B3	Brasy8G259500
Bradi2g48057.1.p	Bradi2g48057	B3	Brasy1G223200
Bradi2g48580.1.p	Bradi2g48580	B3	Brasy1G216400
Bradi2g48597.1.p	Bradi2g48597	B3	Brasy1G216200
Bradi2g48597.2.p	Bradi2g48597	B3	Brasy1G216200
Bradi2g48597.3.p	Bradi2g48597	B3	Brasy1G216200
Bradi2g48597.4.p	Bradi2g48597	B3	Brasy1G216200
Bradi2g48597.5.p	Bradi2g48597	B3	Brasy1G216200
Bradi2g58030.2.p	Bradi2g58030	B3	Brasy1G081900
Bradi2g58030.3.p	Bradi2g58030	B3	Brasy1G081900
Bradi2g58030.4.p	Bradi2g58030	B3	Brasy1G081900
Bradi2g58030.5.p	Bradi2g58030	B3	Brasy1G081900
Bradi2g58030.6.p	Bradi2g58030	B3	Brasy1G081900
Bradi2g58390.1.p	Bradi2g58390	B3	Brasy1G077800
Bradi2g58390.2.p	Bradi2g58390	B3	Brasy1G077800
Bradi2g60554.10.p	Bradi2g60554	B3	Brasy1G033700
Bradi2g60554.11.p	Bradi2g60554	B3	Brasy1G033700
Bradi2g60554.12.p	Bradi2g60554	B3	Brasy1G033700
Bradi2g60554.13.p	Bradi2g60554	B3	Brasy1G033700
Bradi2g60554.14.p	Bradi2g60554	B3	Brasy1G033700
Bradi2g60554.1.p	Bradi2g60554	B3	Brasy1G033700
Bradi2g60554.2.p	Bradi2g60554	B3	Brasy1G033700
Bradi2g60554.3.p	Bradi2g60554	B3	Brasy1G033700
Bradi2g60554.4.p	Bradi2g60554	B3	Brasy1G033700
Bradi2g60554.6.p	Bradi2g60554	B3	Brasy1G033700
Bradi2g60554.7.p	Bradi2g60554	B3	Brasy1G033700
Bradi2g60554.9.p	Bradi2g60554	B3	Brasy1G033700
Bradi3g12910.1.p	Bradi3g12910	B3	Brasy3G083200
Bradi3g16500.1.p	Bradi3g16500	B3	Brasy3G026400
Bradi3g18810.1.p	Bradi3g18810	B3	Brasy3G095300
Bradi3g18810.2.p	Bradi3g18810	B3	Brasy3G095300
Bradi3g18810.3.p	Bradi3g18810	B3	Brasy3G095300
Bradi3g18810.4.p	Bradi3g18810	B3	Brasy3G095300
Bradi3g18810.5.p	Bradi3g18810	B3	Brasy3G095300
Bradi3g18810.6.p	Bradi3g18810	B3	Brasy3G095300
Bradi3g18810.7.p	Bradi3g18810	B3	Brasy3G095300
Bradi3g32140.1.p	Bradi3g32140	B3	BrasyJ001000
Bradi3g47847.1.p	Bradi3g47847	B3	Brasy4G158900
Bradi3g47847.3.p	Bradi3g47847	B3	Brasy4G158900
Bradi3g51840.3.p	Bradi3g51840	B3	Brasy4G104500
Bradi3g51840.4.p	Bradi3g51840	B3	Brasy4G104500
Bradi4g00380.1.p	Bradi4g00380	B3	Brasy5G003600
Bradi4g02950.3.p	Bradi4g02950	B3	Brasy5G033500
Bradi4g02950.4.p	Bradi4g02950	B3	Brasy5G033500
Bradi4g02950.5.p	Bradi4g02950	B3	Brasy5G033500
Bradi4g02996.2.p	Bradi4g02996	B3	Brasy5G034500
Bradi4g03000.10.p	Bradi4g03000	B3	Brasy5G034600
Bradi4g03000.2.p	Bradi4g03000	B3	Brasy5G034600
Bradi4g03000.3.p	Bradi4g03000	B3	Brasy5G034600
Bradi4g03000.4.p	Bradi4g03000	B3	Brasy5G034600
Bradi4g03000.5.p	Bradi4g03000	B3	Brasy5G034600
Bradi4g03000.6.p	Bradi4g03000	B3	Brasy5G034600
Bradi4g03000.7.p	Bradi4g03000	B3	Brasy5G034600
Bradi4g03000.8.p	Bradi4g03000	B3	Brasy5G034600
Bradi4g03000.9.p	Bradi4g03000	B3	Brasy5G034600
Bradi4g23270.1.p	Bradi4g23270	B3	Brasy5G263800
Bradi4g23270.2.p	Bradi4g23270	B3	Brasy5G263800
Bradi4g23270.4.p	Bradi4g23270	B3	Brasy5G263800
Bradi4g23270.5.p	Bradi4g23270	B3	Brasy5G263800
Bradi4g25170.1.p	Bradi4g25170	B3	Brasy5G240500
Bradi4g37946.1.p	Bradi4g37946	B3	Brasy2G474000
Bradi4g37946.2.p	Bradi4g37946	B3	Brasy2G474000
Bradi4g37946.3.p	Bradi4g37946	B3	Brasy2G474000
Bradi4g37946.4.p	Bradi4g37946	B3	Brasy2G474000
Bradi4g37946.5.p	Bradi4g37946	B3	Brasy2G474000
Bradi4g37946.6.p	Bradi4g37946	B3	Brasy2G474000
Bradi4g37946.7.p	Bradi4g37946	B3	Brasy2G474000
Bradi4g42167.1.p	Bradi4g42167	B3	Brasy5G464900
Bradi5g01445.2.p	Bradi5g01445	B3	Brasy9G032100
Bradi5g01445.3.p	Bradi5g01445	B3	Brasy9G032100
Bradi5g01445.4.p	Bradi5g01445	B3	Brasy9G032100
Bradi5g01445.5.p	Bradi5g01445	B3	Brasy9G032100
Bradi5g07925.1.p	Bradi5g07925	B3	Brasy9G105900
Bradi5g19260.2.p	Bradi5g19260	B3	Brasy9G260700
Bradi5g19260.3.p	Bradi5g19260	B3	Brasy9G260700
Bradi5g26100.2.p	Bradi5g26100	B3	Brasy9G347700
Bradi1g03880.1.p	Bradi1g03880	AP2	Brasy5G400000
Bradi1g03880.2.p	Bradi1g03880	AP2	Brasy5G400000
Bradi1g07290.2.p	Bradi1g07290	AP2	Brasy1G100800
Bradi1g07290.3.p	Bradi1g07290	AP2	Brasy1G100800
Bradi1g07290.4.p	Bradi1g07290	AP2	Brasy1G100800
Bradi1g07290.5.p	Bradi1g07290	AP2	Brasy1G100800
Bradi1g30337.1.p	Bradi1g30337	AP2	Brasy1G526800
Bradi1g30337.2.p	Bradi1g30337	AP2	Brasy1G526800
Bradi1g31337.1.p	Bradi1g31337	AP2	Brasy7G208000
Bradi1g51045.1.p	Bradi1g51045	AP2	Brasy7G021800
Bradi1g53650.1.p	Bradi1g53650	AP2	Brasy6G177100
Bradi1g53650.3.p	Bradi1g53650	AP2	Brasy6G177100
Bradi1g53650.4.p	Bradi1g53650	AP2	Brasy6G177100
Bradi1g53650.5.p	Bradi1g53650	AP2	Brasy6G177100
Bradi1g57560.1.p	Bradi1g57560	AP2	Brasy6G236200
Bradi1g57560.2.p	Bradi1g57560	AP2	Brasy6G236200
Bradi1g57560.3.p	Bradi1g57560	AP2	Brasy6G236200
Bradi1g64240.1.p	Bradi1g64240	AP2	Brasy2G190600
Bradi1g69209.1.p	Bradi1g69209	AP2	Brasy2G112300
Bradi1g69209.2.p	Bradi1g69209	AP2	Brasy2G112300
Bradi1g69209.3.p	Bradi1g69209	AP2	Brasy2G112300
Bradi1g69209.4.p	Bradi1g69209	AP2	Brasy2G112300
Bradi1g69209.5.p	Bradi1g69209	AP2	Brasy2G112300
Bradi1g69209.6.p	Bradi1g69209	AP2	Brasy2G112300
Bradi1g69209.7.p	Bradi1g69209	AP2	Brasy2G112300
Bradi1g69209.8.p	Bradi1g69209	AP2	Brasy2G112300
Bradi1g72890.1.p	Bradi1g72890	AP2	Brasy2G494500
Bradi1g72890.2.p	Bradi1g72890	AP2	Brasy2G494500
Bradi2g37800.10.p	Bradi2g37800	AP2	Brasy8G264900
Bradi2g37800.13.p	Bradi2g37800	AP2	Brasy8G264900
Bradi2g37800.3.p	Bradi2g37800	AP2	Brasy8G264900
Bradi2g37800.7.p	Bradi2g37800	AP2	Brasy8G264900
Bradi2g37800.9.p	Bradi2g37800	AP2	Brasy8G264900
Bradi2g48130.2.p	Bradi2g48130	AP2	Brasy1G222300
Bradi2g57747.2.p	Bradi2g57747	AP2	Brasy1G085700
Bradi3g04381.1.p	Bradi3g04381	AP2	Brasy4G375900
Bradi3g15880.1.p	Bradi3g15880	AP2	Brasy3G035800
Bradi3g15880.2.p	Bradi3g15880	AP2	Brasy3G035800
Bradi3g36820.10.p	Bradi3g36820	AP2	Brasy3G261300
Bradi3g36820.3.p	Bradi3g36820	AP2	Brasy3G261300
Bradi3g36820.4.p	Bradi3g36820	AP2	Brasy3G261300
Bradi3g36820.5.p	Bradi3g36820	AP2	Brasy3G261300
Bradi3g36820.6.p	Bradi3g36820	AP2	Brasy3G261300
Bradi3g36820.7.p	Bradi3g36820	AP2	Brasy3G261300
Bradi3g36820.8.p	Bradi3g36820	AP2	Brasy3G261300
Bradi3g36820.9.p	Bradi3g36820	AP2	Brasy3G261300
Bradi3g48697.1.p	Bradi3g48697	AP2	Brasy4G147800
Bradi3g59300.1.p	Bradi3g59300	AP2	Brasy4G013400
Bradi3g59300.3.p	Bradi3g59300	AP2	Brasy4G013400
Bradi4g30617.1.p	Bradi4g30617	AP2	Brasy5G334700
Bradi4g43877.1.p	Bradi4g43877	AP2	Brasy5G487200
Bradi5g14960.1.p	Bradi5g14960	AP2	Brasy9G202900
Bradi5g24100.1.p	Bradi5g24100	AP2	Brasy9G060000
Bradi5g24100.2.p	Bradi5g24100	AP2	Brasy9G060000
Bradi5g24100.3.p	Bradi5g24100	AP2	Brasy9G060000
Bradi5g24360.2.p	Bradi5g24360	AP2	Brasy9G063400
Bradi2g26987.1.p	Bradi2g26987	AP2	Brasy4G255600
Bradi2g37800.14.p	Bradi2g37800	AP2	Brasy8G264900
Bradi2g37800.12.p	Bradi2g37800	AP2	Brasy8G264900
Bradi2g37800.5.p	Bradi2g37800	AP2	Brasy8G264900
Bradi2g37800.11.p	Bradi2g37800	AP2	Brasy8G264900
Bradi2g37800.8.p	Bradi2g37800	AP2	Brasy8G264900
Bradi2g48130.3.p	Bradi2g48130	AP2	Brasy1G222300
Bradi1g00666.1.p	Bradi1g00666	ERF	Brasy2G488800
Bradi1g00666.2.p	Bradi1g00666	ERF	Brasy2G488800
Bradi1g04110.1.p	Bradi1g04110	ERF	Brasy2G409500
Bradi1g18580.1.p	Bradi1g18580	ERF	Brasy6G029400
Bradi1g23756.1.p	Bradi1g23756	ERF	Brasy6G089100
Bradi1g33550.1.p	Bradi1g33550	ERF	Brasy9G055200
Bradi1g35410.1.p	Bradi1g35410	ERF	Brasy7G171400
Bradi1g36590.1.p	Bradi1g36590	ERF	Brasy7G154300
Bradi1g38238.1.p	Bradi1g38238	ERF	Brasy8G100500
Bradi1g45470.1.p	Bradi1g45470	ERF	Brasy7G081800
Bradi1g46120.1.p	Bradi1g46120	ERF	Brasy4G112500
Bradi1g46690.3.p	Bradi1g46690	ERF	Brasy7G071900
Bradi1g47480.1.p	Bradi1g47480	ERF	Brasy7G058400
Bradi1g48320.1.p	Bradi1g48320	ERF	Brasy7G046000
Bradi1g48625.1.p	Bradi1g48625	ERF	Brasy7G041400
Bradi1g49560.1.p	Bradi1g49560	ERF	Brasy7G035600
Bradi1g49570.1.p	Bradi1g49570	ERF	Brasy7G035500
Bradi1g53756.1.p	Bradi1g53756	ERF	Brasy6G178700
Bradi1g54450.1.p	Bradi1g54450	ERF	Brasy6G191600
Bradi1g57970.1.p	Bradi1g57970	ERF	Brasy6G242200
Bradi1g67350.1.p	Bradi1g67350	ERF	Brasy2G150200
Bradi1g71740.1.p	Bradi1g71740	ERF	Brasy2G416700
Bradi1g72449.1.p	Bradi1g72449	ERF	Brasy2G079100
Bradi1g72457.1.p	Bradi1g72457	ERF	Brasy2G079000
Bradi1g72990.2.p	Bradi1g72990	ERF	Brasy2G492500
Bradi1g72990.3.p	Bradi1g72990	ERF	Brasy2G492500
Bradi1g75040.1.p	Bradi1g75040	ERF	Brasy2G064100
Bradi2g02100.1.p	Bradi2g02100	ERF	Brasy1G537000
Bradi2g04000.2.p	Bradi2g04000	ERF	Brasy1G493000
Bradi2g06180.1.p	Bradi2g06180	ERF	Brasy1G470600
Bradi2g07357.1.p	Bradi2g07357	ERF	Brasy6G068600
Bradi2g09434.1.p	Bradi2g09434	ERF	Brasy1G389900
Bradi2g11890.1.p	Bradi2g11890	ERF	Brasy1G348600
Bradi2g16442.1.p	Bradi2g16442	ERF	Brasy8G033200
Bradi2g21060.1.p	Bradi2g21060	ERF	Brasy8G082200
Bradi2g21067.1.p	Bradi2g21067	ERF	Brasy8G082400
Bradi2g22505.1.p	Bradi2g22505	ERF	Brasy8G111200
Bradi2g24175.2.p	Bradi2g24175	ERF	Brasy8G127500
Bradi2g25050.1.p	Bradi2g25050	ERF	Brasy8G133200
Bradi2g27920.1.p	Bradi2g27920	ERF	Brasy8G168300
Bradi2g29010.1.p	Bradi2g29010	ERF	BrasyJ041100
Bradi2g29960.1.p	Bradi2g29960	ERF	Brasy1G567800
Bradi2g29960.2.p	Bradi2g29960	ERF	Brasy1G567800
Bradi2g29960.4.p	Bradi2g29960	ERF	Brasy1G567800
Bradi2g29960.5.p	Bradi2g29960	ERF	Brasy1G567800
Bradi2g29960.6.p	Bradi2g29960	ERF	Brasy1G567800
Bradi2g45530.1.p	Bradi2g45530	ERF	Brasy1G266600
Bradi2g50035.1.p	Bradi2g50035	ERF	Brasy1G198300
Bradi2g52370.1.p	Bradi2g52370	ERF	Brasy1G157800
Bradi2g52380.1.p	Bradi2g52380	ERF	Brasy1G157700
Bradi2g53070.3.p	Bradi2g53070	ERF	Brasy1G144900
Bradi2g56145.1.p	Bradi2g56145	ERF	Brasy1G107900
Bradi2g57201.1.p	Bradi2g57201	ERF	Brasy1G096000
Bradi2g60331.1.p	Bradi2g60331	ERF	Brasy1G039900
Bradi2g60340.1.p	Bradi2g60340	ERF	Brasy1G039900
Bradi3g04375.1.p	Bradi3g04375	ERF	Brasy4G376000
Bradi3g04410.1.p	Bradi3g04410	ERF	Brasy4G375300
Bradi3g06562.1.p	Bradi3g06562	ERF	Brasy4G337700
Bradi3g07450.1.p	Bradi3g07450	ERF	Brasy4G324800
Bradi3g07450.2.p	Bradi3g07450	ERF	Brasy4G324800
Bradi3g08790.1.p	Bradi3g08790	ERF	Brasy4G288500
Bradi3g12565.1.p	Bradi3g12565	ERF	Brasy3G349000
Bradi3g12566.1.p	Bradi3g12566	ERF	Brasy3G349100
Bradi3g12567.1.p	Bradi3g12567	ERF	Brasy3G349200
Bradi3g12680.1.p	Bradi3g12680	ERF	Brasy3G350400
Bradi3g15084.2.p	Bradi3g15084	ERF	Brasy3G045000
Bradi3g15591.1.p	Bradi3g15591	ERF	Brasy3G039300
Bradi3g18070.1.p	Bradi3g18070	ERF	Brasy3G000200
Bradi3g24000.1.p	Bradi3g24000	ERF	Brasy4G226900
Bradi3g27690.1.p	Bradi3g27690	ERF	Brasy3G162800
Bradi3g31600.1.p	Bradi3g31600	ERF	Brasy1G559400
Bradi3g33355.1.p	Bradi3g33355	ERF	Brasy3G213700
Bradi3g35560.1.p	Bradi3g35560	ERF	Brasy3G234800
Bradi3g36820.11.p	Bradi3g36820	ERF	Brasy3G261300
Bradi3g36820.12.p	Bradi3g36820	ERF	Brasy3G261300
Bradi3g36820.13.p	Bradi3g36820	ERF	Brasy3G261300
Bradi3g36820.2.p	Bradi3g36820	ERF	Brasy3G261300
Bradi3g37544.1.p	Bradi3g37544	ERF	Brasy3G274600
Bradi3g38140.1.p	Bradi3g38140	ERF	Brasy3G282200
Bradi3g40343.1.p	Bradi3g40343	ERF	Brasy3G309400
Bradi3g41543.2.p	Bradi3g41543	ERF	Brasy3G326300
Bradi3g42627.1.p	Bradi3g42627	ERF	Brasy3G340100
Bradi3g42627.3.p	Bradi3g42627	ERF	Brasy3G340100
Bradi3g42627.4.p	Bradi3g42627	ERF	Brasy3G340100
Bradi3g42627.5.p	Bradi3g42627	ERF	Brasy3G340100
Bradi3g43822.2.p	Bradi3g43822	ERF	Brasy4G220700
Bradi3g44470.1.p	Bradi3g44470	ERF	Brasy4G213000
Bradi3g45997.1.p	Bradi3g45997	ERF	Brasy4G186100
Bradi3g47610.2.p	Bradi3g47610	ERF	Brasy4G161900
Bradi3g49810.1.p	Bradi3g49810	ERF	Brasy4G311100
Bradi3g50490.1.p	Bradi3g50490	ERF	Brasy4G193700
Bradi3g50508.1.p	Bradi3g50508	ERF	Brasy4G193900
Bradi3g50620.1.p	Bradi3g50620	ERF	Brasy4G195100
Bradi3g50625.1.p	Bradi3g50625	ERF	Brasy4G195200
Bradi3g50630.1.p	Bradi3g50630	ERF	Brasy4G195300
Bradi3g51610.1.p	Bradi3g51610	ERF	Brasy4G107500
Bradi3g51630.2.p	Bradi3g51630	ERF	Brasy4G107300
Bradi3g51630.3.p	Bradi3g51630	ERF	Brasy4G107300
Bradi3g51630.4.p	Bradi3g51630	ERF	Brasy4G107300
Bradi3g54160.1.p	Bradi3g54160	ERF	Brasy4G086500
Bradi3g56801.1.p	Bradi3g56801	ERF	Brasy4G044400
Bradi3g57862.1.p	Bradi3g57862	ERF	Brasy4G028800
Bradi3g58015.1.p	Bradi3g58015	ERF	Brasy4G026800
Bradi3g58980.1.p	Bradi3g58980	ERF	Brasy4G017400
Bradi3g60018.1.p	Bradi3g60018	ERF	Brasy9G291300
Bradi3g60120.1.p	Bradi3g60120	ERF	Brasy4G091800
Bradi3g60120.2.p	Bradi3g60120	ERF	Brasy4G091800
Bradi3g60120.3.p	Bradi3g60120	ERF	Brasy4G091800
Bradi4g03371.2.p	Bradi4g03371	ERF	Brasy5G040500
Bradi4g03371.3.p	Bradi4g03371	ERF	Brasy5G040500
Bradi4g21265.1.p	Bradi4g21265	ERF	Brasy5G283300
Bradi4g27850.1.p	Bradi4g27850	ERF	Brasy5G301000
Bradi4g27850.2.p	Bradi4g27850	ERF	Brasy5G301000
Bradi4g29010.1.p	Bradi4g29010	ERF	Brasy5G318800
Bradi4g31040.1.p	Bradi4g31040	ERF	Brasy5G339400
Bradi4g35580.1.p	Bradi4g35580	ERF	Brasy5G388400
Bradi4g35590.1.p	Bradi4g35590	ERF	Brasy5G388600
Bradi4g35600.1.p	Bradi4g35600	ERF	Brasy5G388700
Bradi4g35620.1.p	Bradi4g35620	ERF	Brasy5G389000
Bradi4g35630.1.p	Bradi4g35630	ERF	Brasy5G389100
Bradi4g35642.1.p	Bradi4g35642	ERF	Brasy5G388400
Bradi4g35650.1.p	Bradi4g35650	ERF	Brasy5G389200
Bradi4g35655.1.p	Bradi4g35655	ERF	Brasy5G389400
Bradi4g38941.1.p	Bradi4g38941	ERF	Brasy5G431600
Bradi4g41616.1.p	Bradi4g41616	ERF	Brasy5G454400
Bradi5g08380.1.p	Bradi5g08380	ERF	Brasy9G112600
Bradi5g08380.2.p	Bradi5g08380	ERF	Brasy9G112600
Bradi5g08471.1.p	Bradi5g08471	ERF	Brasy9G113400
Bradi5g10107.1.p	Bradi5g10107	ERF	Brasy9G130500
Bradi5g11295.1.p	Bradi5g11295	ERF	Brasy9G147200
Bradi5g16450.1.p	Bradi5g16450	ERF	Brasy9G222900
Bradi5g17480.1.p	Bradi5g17480	ERF	Brasy9G235800
Bradi5g17490.1.p	Bradi5g17490	ERF	Brasy9G235900
Bradi5g17610.1.p	Bradi5g17610	ERF	Brasy9G237200
Bradi5g17620.1.p	Bradi5g17620	ERF	Brasy9G237300
Bradi5g17630.1.p	Bradi5g17630	ERF	Brasy9G237400
Bradi5g17640.1.p	Bradi5g17640	ERF	Brasy9G237600
Bradi5g18850.1.p	Bradi5g18850	ERF	Brasy9G255600
Bradi5g21250.3.p	Bradi5g21250	ERF	Brasy5G145500
Bradi5g24110.1.p	Bradi5g24110	ERF	Brasy9G060200
Bradi5g24700.1.p	Bradi5g24700	ERF	Brasy9G272900
Bradi5g24710.1.p	Bradi5g24710	ERF	Brasy9G272800
Bradi5g24720.1.p	Bradi5g24720	ERF	Brasy9G333900
Bradi5g25570.1.p	Bradi5g25570	ERF	Brasy4G232300
Bradi1g35030.1.p	Bradi1g35030	DBB	Brasy7G175600
Bradi1g49260.1.p	Bradi1g49260	DBB	Brasy1G423700
Bradi2g06370.1.p	Bradi2g06370	DBB	Brasy1G468300
Bradi3g48180.1.p	Bradi3g48180	DBB	Brasy4G155000
Bradi3g50166.1.p	Bradi3g50166	DBB	Brasy4G314900
Bradi4g35950.1.p	Bradi4g35950	DBB	Brasy5G393100
Bradi4g35950.3.p	Bradi4g35950	DBB	Brasy5G393100
Bradi4g40250.1.p	Bradi4g40250	DBB	Brasy8G205000
Bradi5g14280.3.p	Bradi5g14280	DBB	Brasy9G193700
Bradi5g14280.4.p	Bradi5g14280	DBB	Brasy9G193700
Bradi5g17080.1.p	Bradi5g17080	DBB	Brasy9G230700
Bradi1g11310.2.p	Bradi1g11310	CO-like	Brasy2G310000
Bradi1g11310.3.p	Bradi1g11310	CO-like	Brasy2G310000
Bradi1g31280.1.p	Bradi1g31280	CO-like	Brasy7G208800
Bradi1g43220.1.p	Bradi1g43220	CO-like	Brasy4G119000
Bradi1g43990.1.p	Bradi1g43990	CO-like	Brasy7G111900
Bradi1g52360.1.p	Bradi1g52360	CO-like	Brasy7G001800
Bradi3g05800.1.p	Bradi3g05800	CO-like	Brasy4G348500
Bradi3g19010.1.p	Bradi3g19010	CO-like	Brasy3G097700
Bradi3g41500.1.p	Bradi3g41500	CO-like	Brasy3G325700
Bradi3g48447.1.p	Bradi3g48447	CO-like	Brasy4G150900
Bradi3g56260.2.p	Bradi3g56260	CO-like	Brasy4G050300
Bradi3g56490.1.p	Bradi3g56490	CO-like	Brasy4G047600
Bradi3g56490.3.p	Bradi3g56490	CO-like	Brasy4G047600
Bradi3g57000.2.p	Bradi3g57000	CO-like	Brasy4G040900
Bradi3g57000.3.p	Bradi3g57000	CO-like	Brasy4G040900
Bradi5g14600.1.p	Bradi5g14600	CO-like	Brasy9G197600
Bradi5g14600.2.p	Bradi5g14600	CO-like	Brasy9G197600
Bradi1g30813.2.p	Bradi1g30813	ARR-B	Brasy7G215800
Bradi1g34695.1.p	Bradi1g34695	ARR-B	Brasy7G180800
Bradi1g47400.1.p	Bradi1g47400	ARR-B	Brasy7G062900
Bradi1g47400.2.p	Bradi1g47400	ARR-B	Brasy7G062900
Bradi1g69480.1.p	Bradi1g69480	ARR-B	Brasy2G109100
Bradi1g69480.2.p	Bradi1g69480	ARR-B	Brasy2G109100
Bradi1g69480.3.p	Bradi1g69480	ARR-B	Brasy2G109100
Bradi2g58020.1.p	Bradi2g58020	ARR-B	Brasy1G082100
Bradi2g58020.2.p	Bradi2g58020	ARR-B	Brasy1G082100
Bradi3g06120.1.p	Bradi3g06120	ARR-B	Brasy4G343500
Bradi3g54120.1.p	Bradi3g54120	ARR-B	Brasy4G086900
Bradi3g54120.2.p	Bradi3g54120	ARR-B	Brasy4G086900
Bradi4g16463.1.p	Bradi4g16463	ARR-B	BrasyJ076700
Bradi1g07511.1.p	Bradi1g07511	G2-like	Brasy2G353900
Bradi1g07630.1.p	Bradi1g07630	G2-like	Brasy2G352600
Bradi1g13425.1.p	Bradi1g13425	G2-like	Brasy2G276100
Bradi1g14480.2.p	Bradi1g14480	G2-like	Brasy3G256100
Bradi1g17400.1.p	Bradi1g17400	G2-like	Brasy6G010100
Bradi1g28920.4.p	Bradi1g28920	G2-like	Brasy9G240900
Bradi1g28920.5.p	Bradi1g28920	G2-like	Brasy9G240900
Bradi1g28920.6.p	Bradi1g28920	G2-like	Brasy9G240900
Bradi1g31837.1.p	Bradi1g31837	G2-like	Brasy1G094900
Bradi1g32370.1.p	Bradi1g32370	G2-like	Brasy7G199200
Bradi1g34470.1.p	Bradi1g34470	G2-like	Brasy9G042200
Bradi1g34470.2.p	Bradi1g34470	G2-like	Brasy9G042200
Bradi1g34470.3.p	Bradi1g34470	G2-like	Brasy9G042200
Bradi1g34470.5.p	Bradi1g34470	G2-like	Brasy9G042200
Bradi1g34470.6.p	Bradi1g34470	G2-like	Brasy9G042200
Bradi1g36236.1.p	Bradi1g36236	G2-like	Brasy7G158400
Bradi1g36236.2.p	Bradi1g36236	G2-like	Brasy7G158400
Bradi1g36236.3.p	Bradi1g36236	G2-like	Brasy7G158400
Bradi1g36236.4.p	Bradi1g36236	G2-like	Brasy7G158400
Bradi1g39180.2.p	Bradi1g39180	G2-like	Brasy2G238400
Bradi1g43710.1.p	Bradi1g43710	G2-like	Brasy7G115500
Bradi1g43710.3.p	Bradi1g43710	G2-like	Brasy7G115500
Bradi1g43710.4.p	Bradi1g43710	G2-like	Brasy7G115500
Bradi1g58830.1.p	Bradi1g58830	G2-like	Brasy6G257300
Bradi1g63530.1.p	Bradi1g63530	G2-like	Brasy2G198600
Bradi1g63530.3.p	Bradi1g63530	G2-like	Brasy2G198600
Bradi1g63690.1.p	Bradi1g63690	G2-like	Brasy2G197000
Bradi1g63690.2.p	Bradi1g63690	G2-like	Brasy2G197000
Bradi1g71910.3.p	Bradi1g71910	G2-like	Brasy2G085700
Bradi2g04810.1.p	Bradi2g04810	G2-like	Brasy3G271300
Bradi2g08287.1.p	Bradi2g08287	G2-like	Brasy1G432100
Bradi2g08287.2.p	Bradi2g08287	G2-like	Brasy1G432100
Bradi2g08287.3.p	Bradi2g08287	G2-like	Brasy1G432100
Bradi2g08287.4.p	Bradi2g08287	G2-like	Brasy1G432100
Bradi2g08287.5.p	Bradi2g08287	G2-like	Brasy1G432100
Bradi2g11400.2.p	Bradi2g11400	G2-like	Brasy1G356900
Bradi2g11400.3.p	Bradi2g11400	G2-like	Brasy1G356900
Bradi2g11400.4.p	Bradi2g11400	G2-like	Brasy1G356900
Bradi2g11400.5.p	Bradi2g11400	G2-like	Brasy1G356900
Bradi2g11400.6.p	Bradi2g11400	G2-like	Brasy1G356900
Bradi2g11400.7.p	Bradi2g11400	G2-like	Brasy1G356900
Bradi2g11400.8.p	Bradi2g11400	G2-like	Brasy1G356900
Bradi2g11400.9.p	Bradi2g11400	G2-like	Brasy1G356900
Bradi2g11743.1.p	Bradi2g11743	G2-like	Brasy1G350500
Bradi2g11743.2.p	Bradi2g11743	G2-like	Brasy1G350500
Bradi2g21407.2.p	Bradi2g21407	G2-like	Brasy8G087200
Bradi2g21407.3.p	Bradi2g21407	G2-like	Brasy8G087200
Bradi2g21407.4.p	Bradi2g21407	G2-like	Brasy8G087200
Bradi2g21407.5.p	Bradi2g21407	G2-like	Brasy8G087200
Bradi2g21880.1.p	Bradi2g21880	G2-like	Brasy8G089700
Bradi2g21880.2.p	Bradi2g21880	G2-like	Brasy8G089700
Bradi2g25380.1.p	Bradi2g25380	G2-like	Brasy8G139300
Bradi2g54791.1.p	Bradi2g54791	G2-like	Brasy1G126900
Bradi2g54791.2.p	Bradi2g54791	G2-like	Brasy1G126900
Bradi2g62067.1.p	Bradi2g62067	G2-like	Brasy1G009200
Bradi3g00550.2.p	Bradi3g00550	G2-like	Brasy4G437200
Bradi3g00550.3.p	Bradi3g00550	G2-like	Brasy4G437200
Bradi3g00550.4.p	Bradi3g00550	G2-like	Brasy4G437200
Bradi3g03538.2.p	Bradi3g03538	G2-like	Brasy4G390800
Bradi3g03538.3.p	Bradi3g03538	G2-like	Brasy4G390800
Bradi3g03538.4.p	Bradi3g03538	G2-like	Brasy4G390800
Bradi3g05500.2.p	Bradi3g05500	G2-like	Brasy4G352500
Bradi3g05500.4.p	Bradi3g05500	G2-like	Brasy4G352500
Bradi3g05500.5.p	Bradi3g05500	G2-like	Brasy4G352500
Bradi3g05500.6.p	Bradi3g05500	G2-like	Brasy4G352500
Bradi3g09160.1.p	Bradi3g09160	G2-like	Brasy4G279900
Bradi3g10730.1.p	Bradi3g10730	G2-like	Brasy4G257800
Bradi3g16340.1.p	Bradi3g16340	G2-like	Brasy3G028800
Bradi3g22290.2.p	Bradi3g22290	G2-like	Brasy1G330200
Bradi3g22290.3.p	Bradi3g22290	G2-like	Brasy1G330200
Bradi3g22290.4.p	Bradi3g22290	G2-like	Brasy1G330200
Bradi3g22290.5.p	Bradi3g22290	G2-like	Brasy1G330200
Bradi3g22290.6.p	Bradi3g22290	G2-like	Brasy1G330200
Bradi3g22297.1.p	Bradi3g22297	G2-like	Brasy1G330100
Bradi3g22297.2.p	Bradi3g22297	G2-like	Brasy1G330100
Bradi3g32241.1.p	Bradi3g32241	G2-like	Brasy3G200300
Bradi3g36260.2.p	Bradi3g36260	G2-like	Brasy3G244000
Bradi3g36710.2.p	Bradi3g36710	G2-like	Brasy3G260300
Bradi3g36710.3.p	Bradi3g36710	G2-like	Brasy3G260300
Bradi3g36710.4.p	Bradi3g36710	G2-like	Brasy3G260300
Bradi3g36710.5.p	Bradi3g36710	G2-like	Brasy3G260300
Bradi3g36710.6.p	Bradi3g36710	G2-like	Brasy3G260300
Bradi3g36710.7.p	Bradi3g36710	G2-like	Brasy3G260300
Bradi3g36710.8.p	Bradi3g36710	G2-like	Brasy3G260300
Bradi3g36710.9.p	Bradi3g36710	G2-like	Brasy3G260300
Bradi3g51409.1.p	Bradi3g51409	G2-like	Brasy4G114400
Bradi3g52320.1.p	Bradi3g52320	G2-like	Brasy2G376400
Bradi3g52320.2.p	Bradi3g52320	G2-like	Brasy2G376400
Bradi3g52320.3.p	Bradi3g52320	G2-like	Brasy2G376400
Bradi3g52500.2.p	Bradi3g52500	G2-like	Brasy2G378500
Bradi3g52500.3.p	Bradi3g52500	G2-like	Brasy2G378500
Bradi3g52500.4.p	Bradi3g52500	G2-like	Brasy2G378500
Bradi4g03160.1.p	Bradi4g03160	G2-like	Brasy5G036000
Bradi4g26802.1.p	Bradi4g26802	G2-like	Brasy5G220500
Bradi4g27607.2.p	Bradi4g27607	G2-like	Brasy5G292800
Bradi4g27607.3.p	Bradi4g27607	G2-like	Brasy5G292800
Bradi4g27607.4.p	Bradi4g27607	G2-like	Brasy5G292800
Bradi4g27620.1.p	Bradi4g27620	G2-like	Brasy5G292700
Bradi4g27620.2.p	Bradi4g27620	G2-like	Brasy5G292700
Bradi4g29700.2.p	Bradi4g29700	G2-like	Brasy6G133400
Bradi4g44930.2.p	Bradi4g44930	G2-like	Brasy5G516500
Bradi5g18590.1.p	Bradi5g18590	G2-like	Brasy9G251300
Bradi5g20520.1.p	Bradi5g20520	G2-like	Brasy9G305100
Bradi5g20520.2.p	Bradi5g20520	G2-like	Brasy9G305100
Bradi5g20520.3.p	Bradi5g20520	G2-like	Brasy9G305100
Bradi5g25320.1.p	Bradi5g25320	G2-like	Brasy9G264400
Bradi5g25320.2.p	Bradi5g25320	G2-like	Brasy9G264400
Bradi1g08326.1.p	Bradi1g08326	MIKC_MADS	Brasy2G344600
Bradi1g08340.1.p	Bradi1g08340	MIKC_MADS	Brasy2G344500
Bradi1g21980.2.p	Bradi1g21980	MIKC_MADS	Brasy6G064600
Bradi1g21980.3.p	Bradi1g21980	MIKC_MADS	Brasy6G064600
Bradi1g21980.4.p	Bradi1g21980	MIKC_MADS	Brasy6G064600
Bradi1g35000.1.p	Bradi1g35000	MIKC_MADS	Brasy7G176100
Bradi1g45812.1.p	Bradi1g45812	MIKC_MADS	Brasy7G076800
Bradi1g48520.1.p	Bradi1g48520	MIKC_MADS	Brasy7G043300
Bradi1g69890.2.p	Bradi1g69890	MIKC_MADS	Brasy2G104000
Bradi1g72150.3.p	Bradi1g72150	MIKC_MADS	Brasy2G082100
Bradi1g72150.5.p	Bradi1g72150	MIKC_MADS	Brasy2G082100
Bradi1g72150.6.p	Bradi1g72150	MIKC_MADS	Brasy2G082100
Bradi1g72150.7.p	Bradi1g72150	MIKC_MADS	Brasy2G082100
Bradi1g77020.1.p	Bradi1g77020	MIKC_MADS	Brasy2G038000
Bradi2g06330.1.p	Bradi2g06330	MIKC_MADS	Brasy1G468700
Bradi2g06330.2.p	Bradi2g06330	MIKC_MADS	Brasy1G468700
Bradi2g06330.3.p	Bradi2g06330	MIKC_MADS	Brasy1G468700
Bradi2g06330.4.p	Bradi2g06330	MIKC_MADS	Brasy1G468700
Bradi2g24940.2.p	Bradi2g24940	MIKC_MADS	Brasy8G131900
Bradi2g25090.1.p	Bradi2g25090	MIKC_MADS	Brasy9G241400
Bradi2g32910.1.p	Bradi2g32910	MIKC_MADS	Brasy8G235900
Bradi2g32910.2.p	Bradi2g32910	MIKC_MADS	Brasy8G235900
Bradi2g32910.3.p	Bradi2g32910	MIKC_MADS	Brasy8G235900
Bradi2g32910.4.p	Bradi2g32910	MIKC_MADS	Brasy8G235900
Bradi2g48690.1.p	Bradi2g48690	MIKC_MADS	Brasy1G215100
Bradi2g57000.1.p	Bradi2g57000	MIKC_MADS	Brasy1G097800
Bradi2g57000.2.p	Bradi2g57000	MIKC_MADS	Brasy1G097800
Bradi3g05260.1.p	Bradi3g05260	MIKC_MADS	Brasy4G362800
Bradi3g13570.1.p	Bradi3g13570	MIKC_MADS	Brasy3G074200
Bradi3g32090.1.p	Bradi3g32090	MIKC_MADS	Brasy4G110900
Bradi3g32090.2.p	Bradi3g32090	MIKC_MADS	Brasy4G110900
Bradi3g41260.1.p	Bradi3g41260	MIKC_MADS	Brasy3G316700
Bradi3g46920.2.p	Bradi3g46920	MIKC_MADS	Brasy4G170600
Bradi3g51800.2.p	Bradi3g51800	MIKC_MADS	Brasy4G104900
Bradi3g57017.1.p	Bradi3g57017	MIKC_MADS	Brasy4G040600
Bradi3g57017.4.p	Bradi3g57017	MIKC_MADS	Brasy4G040600
Bradi3g57017.5.p	Bradi3g57017	MIKC_MADS	Brasy4G040600
Bradi3g57017.6.p	Bradi3g57017	MIKC_MADS	Brasy4G040600
Bradi3g57017.7.p	Bradi3g57017	MIKC_MADS	Brasy4G040600
Bradi3g57017.8.p	Bradi3g57017	MIKC_MADS	Brasy4G040600
Bradi3g57017.9.p	Bradi3g57017	MIKC_MADS	Brasy4G040600
Bradi3g58220.2.p	Bradi3g58220	MIKC_MADS	Brasy4G024400
Bradi4g06867.1.p	Bradi4g06867	MIKC_MADS	BrasyJ032000
Bradi4g34680.1.p	Bradi4g34680	MIKC_MADS	Brasy5G376500
Bradi4g40350.2.p	Bradi4g40350	MIKC_MADS	Brasy8G203900
Bradi4g40350.3.p	Bradi4g40350	MIKC_MADS	Brasy8G203900
Bradi4g40350.4.p	Bradi4g40350	MIKC_MADS	Brasy8G203900
Bradi4g40350.5.p	Bradi4g40350	MIKC_MADS	Brasy8G203900
Bradi4g40357.1.p	Bradi4g40357	MIKC_MADS	Brasy8G203800
Bradi5g08062.1.p	Bradi5g08062	MIKC_MADS	Brasy9G106500
Bradi5g11270.1.p	Bradi5g11270	MIKC_MADS	Brasy9G147500
Bradi5g21700.2.p	Bradi5g21700	MIKC_MADS	Brasy1G437800
Bradi5g21700.3.p	Bradi5g21700	MIKC_MADS	Brasy1G437800
Bradi1g15482.1.p	Bradi1g15482	M-type_MADS	Brasy2G246500
Bradi1g25297.2.p	Bradi1g25297	M-type_MADS	Brasy6G118600
Bradi1g25300.1.p	Bradi1g25300	M-type_MADS	Brasy6G118900
Bradi1g27901.1.p	Bradi1g27901	M-type_MADS	Brasy6G158800
Bradi1g39927.1.p	Bradi1g39927	M-type_MADS	Brasy2G235900
Bradi1g46675.1.p	Bradi1g46675	M-type_MADS	Brasy7G072200
Bradi1g55041.1.p	Bradi1g55041	M-type_MADS	Brasy1G419900
Bradi1g55051.1.p	Bradi1g55051	M-type_MADS	Brasy1G419800
Bradi1g57410.3.p	Bradi1g57410	M-type_MADS	Brasy6G233900
Bradi1g57422.1.p	Bradi1g57422	M-type_MADS	Brasy6G234000
Bradi1g57870.1.p	Bradi1g57870	M-type_MADS	Brasy6G241100
Bradi1g57875.2.p	Bradi1g57875	M-type_MADS	Brasy6G241200
Bradi1g70942.1.p	Bradi1g70942	M-type_MADS	Brasy2G091700
Bradi2g10745.1.p	Bradi2g10745	M-type_MADS	Brasy6G025500
Bradi2g11145.1.p	Bradi2g11145	M-type_MADS	Brasy1G367700
Bradi2g11156.1.p	Bradi2g11156	M-type_MADS	Brasy1G367600
Bradi2g11163.1.p	Bradi2g11163	M-type_MADS	Brasy1G367400
Bradi2g12566.1.p	Bradi2g12566	M-type_MADS	Brasy7G153000
Bradi2g30530.1.p	Bradi2g30530	M-type_MADS	Brasy8G175900
Bradi2g36774.1.p	Bradi2g36774	M-type_MADS	Brasy8G249400
Bradi2g36778.1.p	Bradi2g36778	M-type_MADS	Brasy8G249500
Bradi2g36782.1.p	Bradi2g36782	M-type_MADS	Brasy8G249800
Bradi2g38695.1.p	Bradi2g38695	M-type_MADS	Brasy8G255000
Bradi2g43290.1.p	Bradi2g43290	M-type_MADS	Brasy1G278600
Bradi2g58503.1.p	Bradi2g58503	M-type_MADS	Brasy1G076300
Bradi2g59119.1.p	Bradi2g59119	M-type_MADS	Brasy1G065000
Bradi2g59119.2.p	Bradi2g59119	M-type_MADS	Brasy1G065000
Bradi2g62515.1.p	Bradi2g62515	M-type_MADS	Brasy1G003900
Bradi3g04880.1.p	Bradi3g04880	M-type_MADS	Brasy4G369000
Bradi3g18670.2.p	Bradi3g18670	M-type_MADS	Brasy3G093200
Bradi3g39177.1.p	Bradi3g39177	M-type_MADS	Brasy3G295000
Bradi3g41297.1.p	Bradi3g41297	M-type_MADS	Brasy3G322800
Bradi4g39415.1.p	Bradi4g39415	M-type_MADS	Brasy4G318200
Bradi4g39420.1.p	Bradi4g39420	M-type_MADS	Brasy4G318100
Bradi1g09900.1.p	Bradi1g09900	GRF	Brasy2G325000
Bradi1g09900.2.p	Bradi1g09900	GRF	Brasy2G325000
Bradi1g12650.1.p	Bradi1g12650	GRF	Brasy7G058900
Bradi1g28400.1.p	Bradi1g28400	GRF	Brasy6G152400
Bradi1g46427.1.p	Bradi1g46427	GRF	Brasy1G150500
Bradi1g50597.1.p	Bradi1g50597	GRF	Brasy7G027800
Bradi3g51685.1.p	Bradi3g51685	GRF	Brasy4G106700
Bradi3g52547.1.p	Bradi3g52547	GRF	Brasy2G379200
Bradi4g16450.2.p	Bradi4g16450	GRF	Brasy4G010200
Bradi4g16450.3.p	Bradi4g16450	GRF	Brasy4G010200
Bradi5g18961.1.p	Bradi5g18961	GRF	Brasy9G257000
Bradi5g20607.1.p	Bradi5g20607	GRF	Brasy9G306000
Bradi1g36770.2.p	Bradi1g36770	HB-other	Brasy7G151200
Bradi1g36770.3.p	Bradi1g36770	HB-other	Brasy7G151200
Bradi1g36770.4.p	Bradi1g36770	HB-other	Brasy7G151200
Bradi1g36770.5.p	Bradi1g36770	HB-other	Brasy7G151200
Bradi1g36770.6.p	Bradi1g36770	HB-other	Brasy7G151200
Bradi1g37800.1.p	Bradi1g37800	HB-other	Brasy7G137100
Bradi1g42040.1.p	Bradi1g42040	HB-other	Brasy7G128900
Bradi1g42040.2.p	Bradi1g42040	HB-other	Brasy7G128900
Bradi1g42040.3.p	Bradi1g42040	HB-other	Brasy7G128900
Bradi1g42040.4.p	Bradi1g42040	HB-other	Brasy7G128900
Bradi1g42040.5.p	Bradi1g42040	HB-other	Brasy7G128900
Bradi1g42040.6.p	Bradi1g42040	HB-other	Brasy7G128900
Bradi2g16647.1.p	Bradi2g16647	HB-other	Brasy2G137100
Bradi2g46230.1.p	Bradi2g46230	HB-other	Brasy1G260800
Bradi2g59937.1.p	Bradi2g59937	HB-other	Brasy1G053300
Bradi4g03303.1.p	Bradi4g03303	HB-other	Brasy5G040000
Bradi4g03303.2.p	Bradi4g03303	HB-other	Brasy5G040000
Bradi4g03303.3.p	Bradi4g03303	HB-other	Brasy5G040000
Bradi4g03303.4.p	Bradi4g03303	HB-other	Brasy5G040000
Bradi4g03303.5.p	Bradi4g03303	HB-other	Brasy5G040000
Bradi4g03303.6.p	Bradi4g03303	HB-other	Brasy5G040000
Bradi4g03303.7.p	Bradi4g03303	HB-other	Brasy5G040000
Bradi4g11517.1.p	Bradi4g11517	HB-other	Brasy5G180800
Bradi4g11517.2.p	Bradi4g11517	HB-other	Brasy5G180800
Bradi4g11517.5.p	Bradi4g11517	HB-other	Brasy5G180800
Bradi5g10370.2.p	Bradi5g10370	HB-other	Brasy9G136200
Bradi4g45325.1.p	Bradi4g45325	WOX	Brasy5G523900
Bradi2g37650.1.p	Bradi2g37650	WOX	Brasy8G262800
Bradi5g24080.1.p	Bradi5g24080	WOX	Brasy9G059700
Bradi2g55270.1.p	Bradi2g55270	WOX	Brasy1G119800
Bradi5g25113.1.p	Bradi5g25113	WOX	Brasy9G267900
Bradi1g63680.2.p	Bradi1g63680	WOX	Brasy2G197100
Bradi2g46055.1.p	Bradi2g46055	WOX	Brasy1G262500
[truncated: 616 more rows]
