# Supplementary material
Source: publisher figshare collection journal article supplement (https://gsajournals.figshare.com/articles/dataset/_/23519004)
Supplement: Supplementary file 2 [file 1]

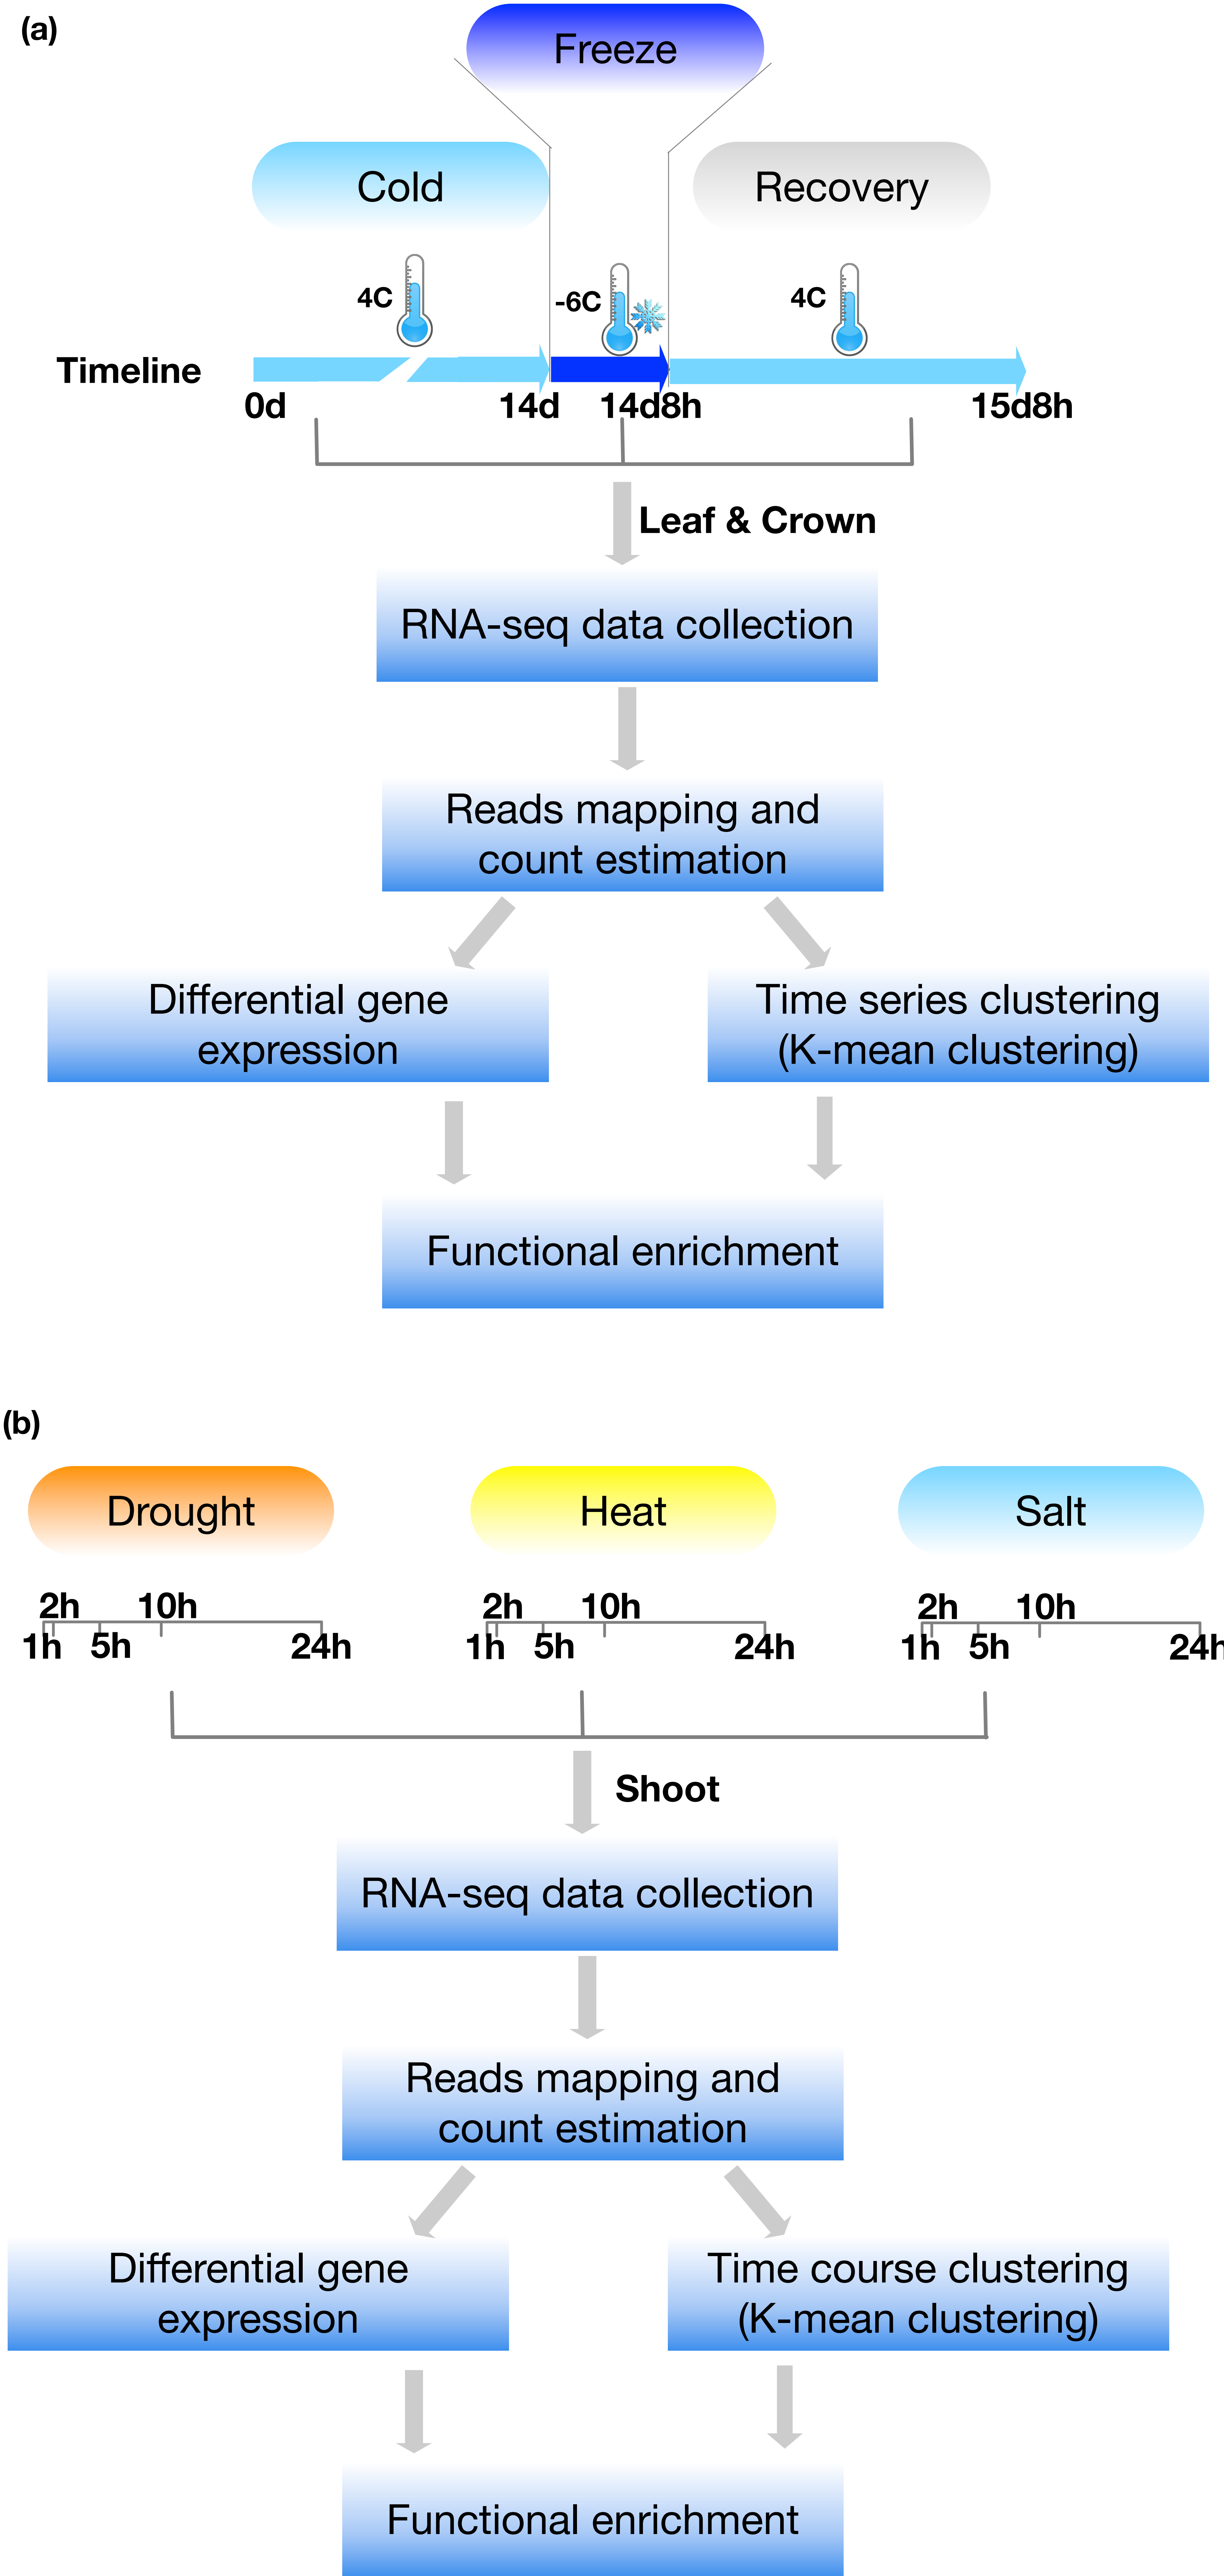

**Figure S2** RNAseq experimental designs. (a) Leaf and crown under cold, freezing, and recovery; (b) Shoot treated under drought, heat, and salt stresses along five timepoints.
