# Supplementary material
Source: publisher figshare collection journal article supplement (https://gsajournals.figshare.com/articles/dataset/_/23519004)
Supplement: Supplementary file 4 [file 1]

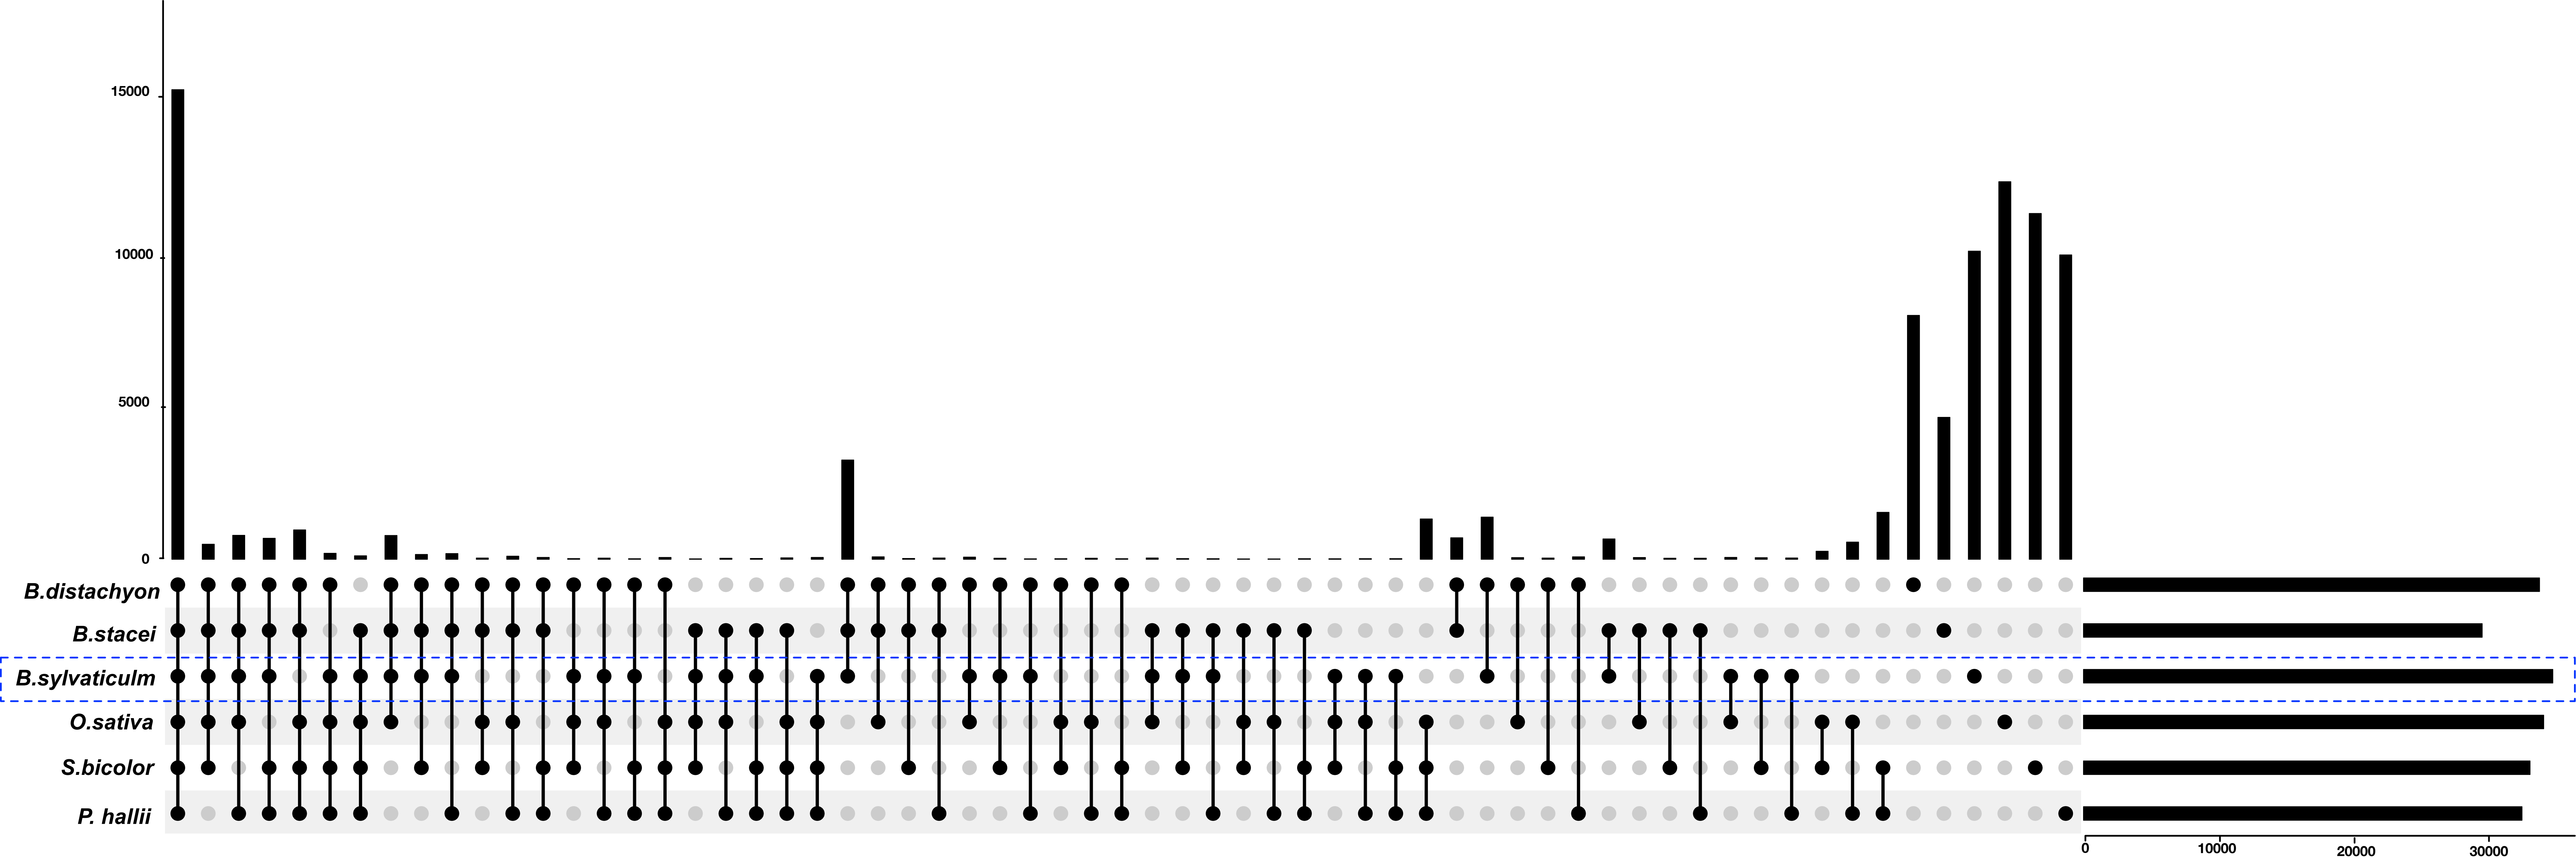

**Figure S1** Upset plot of showing orthologs shared by all combinations of six grass species. Note some of these were shown in figure 6.
